# Supplementary material for: Schiff base tetranuclear Zn2Ln2 single-molecule magnets bridged by hydroxamic acid in association with near-infrared luminescence
Source: Royal Society of Chemistry journal article supplement (doi:10.1039/d2dt00001f), 2022-01-01
Supplement: d2dt00001f1.pdf [file d2dt00001f1.pdf]

Supporting Information

**Schiff Base Tetranuclear Zn<sub>2</sub>Ln<sub>2</sub> Single-Molecule Magnets bridged by Hydroxamic acid  
in association with Near-Infrared Luminescence**

Han Yan,<sup>[a]</sup> Chu-Meng Wang,<sup>[a]</sup> Peng Chen,<sup>[a]</sup> Yi-Quan Zhang,<sup>[b]</sup> \* and Wen-Bin Sun<sup>[a]</sup>\*

*a. Key Laboratory of Functional Inorganic Material Chemistry Ministry of Education, School of Chemistry and Material Science Heilongjiang University, 74 Xuefu Road, Harbin 150080, P. R. China.*

*E-mail: wenbinsun@126.com*

*b. Jiangsu Key Laboratory for NSLSCS, School of Physical Science and Technology, Nanjing Normal University, Nanjing 210023, P. R. China.*

*E-mail: zhangyiquan@njnu.edu.cn*

**Table S1.** Crystallographic data for **1–3**.

| <b>complex</b>                                     | <b>1</b>                              | <b>2</b>                              | <b>3</b>                              |
|----------------------------------------------------|---------------------------------------|---------------------------------------|---------------------------------------|
| Empirical formula                                  | $C_{74}H_{72}DY_2F_6N_8O_{22}S_2Zn_2$ | $C_{64}H_{62}DY_2F_6N_6O_{22}S_2Zn_2$ | $C_{52}H_{50}DY_2F_6N_6O_{20}S_2Zn_2$ |
| FW (g.mol <sup>-1</sup> )                          | 2059.25                               | 1901.05                               | 1712.84                               |
| Space group                                        | triclinic                             | triclinic                             | triclinic                             |
| Cryst syst                                         | P-1                                   | P-1                                   | P-1                                   |
| Temperature (K)                                    | 293                                   | 293                                   | 293                                   |
| <i>a</i> (Å)                                       | 11.4595(8)                            | 11.4657(9)                            | 9.7930(2)                             |
| <i>b</i> (Å)                                       | 13.0291(9)                            | 12.0293(12)                           | 12.5562(3)                            |
| <i>c</i> (Å)                                       | 14.9566(13)                           | 13.8868(12)                           | 13.7239(4)                            |
| $\alpha$ (°)                                       | 66.441(7)                             | 105.941(8)                            | 69.416(2)                             |
| $\beta$ (°)                                        | 75.472(7)                             | 106.253(7)                            | 72.247(2)                             |
| $\gamma$ (°)                                       | 85.913(6)                             | 90.945(7)                             | 81.336(2)                             |
| <i>V</i> (Å <sup>3</sup> )                         | 1980.5(3)                             | 1759.0(3)                             | 1502.78(7)                            |
| $\rho_{\text{calc}}$ (Mg.m <sup>-3</sup> )         | 1.727                                 | 1.795                                 | 1.893                                 |
| $\mu$ (mm <sup>-1</sup> )                          | 2.608                                 | 2.928                                 | 3.413                                 |
| <i>F</i> (000)                                     | 1026.0                                | 942.0                                 | 842.0                                 |
| Independent reflections                            | 9053                                  | 7448                                  | 8045                                  |
| <i>R</i> <sub>int</sub>                            | 0.0255                                | 0.0418                                | 0.0400                                |
| <i>R</i> <sub>1</sub> [ <i>I</i> > 2σ( <i>I</i> )] | 0.0248                                | 0.0316                                | 0.0229                                |
| <i>wR</i> <sub>2</sub> (all data)                  | 0.0614                                | 0.0798                                | 0.0509                                |
| Goodness of fit on <i>F</i> <sup>2</sup>           | 1.053                                 | 1.077                                 | 1.037                                 |
| CCDC numbers                                       | 2070819                               | 2070820                               | 2070821                               |

**Table S2.** Crystallographic data for **4–6**.

| <b>complex</b>                                     | <b>4</b>                              | <b>5</b>                              | <b>6</b>                              |
|----------------------------------------------------|---------------------------------------|---------------------------------------|---------------------------------------|
| Empirical formula                                  | $C_{56}H_{56}Dy_2F_6N_6O_{20}S_2Zn_2$ | $C_{46}H_{54}Dy_2F_6N_6O_{20}S_2Zn_2$ | $C_{56}H_{58}Dy_2F_6N_6O_{20}S_2Zn_2$ |
| FW (g.mol <sup>-1</sup> )                          | 1766.92                               | 1644.81                               | 1768.94                               |
| Space group                                        | triclinic                             | triclinic                             | triclinic                             |
| Crystalsyst                                        | P-1                                   | P-1                                   | P-1                                   |
| Temperature (K)                                    | 296                                   | 296.15                                | 296.15                                |
| <i>a</i> (Å)                                       | 9.9468(19)                            | 10.0359(8)                            | 12.0729(8)                            |
| <i>b</i> (Å)                                       | 12.324(2)                             | 12.3262(10)                           | 16.2803(11)                           |
| <i>c</i> (Å)                                       | 13.388(3)                             | 13.6183(11)                           | 17.2687(11)                           |
| $\alpha$ (°)                                       | 95.288(2)                             | 107.521(10)                           | 73.557(10)                            |
| $\beta$ (°)                                        | 95.851(2)                             | 110.872(10)                           | 88.287(10)                            |
| $\gamma$ (°)                                       | 96.332(2)                             | 96.249(10)                            | 78.402(10)                            |
| <i>V</i> (Å <sup>3</sup> )                         | 1613.7(5)                             | 1456.2(2)                             | 3187.6(4)                             |
| $\rho_{\text{cacl}}$ (Mg.m <sup>-3</sup> )         | 1.818                                 | 1.876                                 | 1.843                                 |
| $\mu$ (mm <sup>-1</sup> )                          | 3.181                                 | 3.517                                 | 3.221                                 |
| <i>F</i> (000)                                     | 872.0                                 | 810.0                                 | 1748.0                                |
| Independent relections                             | 6538                                  | 7262                                  | 15905                                 |
| <i>R</i> <sub>int</sub>                            | 0.0255                                | 0.0209                                | 0.0208                                |
| <i>R</i> <sub>1</sub> [ <i>I</i> > 2σ( <i>I</i> )] | 0.0578                                | 0.0311                                | 0.0319                                |
| <i>wR</i> <sub>2</sub> (all data)                  | 0.1732                                | 0.0825                                | 0.0967                                |
| Goodness of fit on <i>F</i> <sup>2</sup>           | 1.063                                 | 1.048                                 | 1.018                                 |
| CCDC numbers                                       | 2070822                               | 2070823                               | 2070824                               |

**Table S3.** Crystallographic data for **7** and **8**.

| <b>complex</b>                                     | <b>7</b>                              | <b>8</b>                              |
|----------------------------------------------------|---------------------------------------|---------------------------------------|
| Empirical formula                                  | $C_{74}H_{74}F_6N_8O_{22}S_2Yb_2Zn_2$ | $C_{52}H_{50}F_6N_6O_{20}S_2Yb_2Zn_2$ |
| FW (g.mol <sup>-1</sup> )                          | 2082.35                               | 1733.92                               |
| Space group                                        | triclinic                             | triclinic                             |
| Crystalsyst                                        | P-1                                   | P-1                                   |
| Temperature (K)                                    | 298                                   | 298                                   |
| <i>a</i> (Å)                                       | 11.482(3)                             | 9.6806(15)                            |
| <i>b</i> (Å)                                       | 13.039(3)                             | 12.528(2)                             |
| <i>c</i> (Å)                                       | 14.779(4)                             | 13.601(2)                             |
| $\alpha$ (°)                                       | 66.77(3)                              | 69.687(15)                            |
| $\beta$ (°)                                        | 75.78(3)                              | 71.999(14)                            |
| $\gamma$ (°)                                       | 85.79(2)                              | 81.437(14)                            |
| <i>V</i> (Å <sup>3</sup> )                         | 1970.3(10)                            | 1469.6(4)                             |
| $\rho_{\text{calc}}$ (Mg.m <sup>-3</sup> )         | 1.755                                 | 1.959                                 |
| $\mu$ (mm <sup>-1</sup> )                          | 3.099                                 | 4.130                                 |
| <i>F</i> (000)                                     | 1036.0                                | 850.0                                 |
| Independent reflections                            | 8824                                  | 7399                                  |
| <i>R</i> <sub>int</sub>                            | 0.1133                                | 0.0630                                |
| <i>R</i> <sub>1</sub> [ <i>I</i> > 2σ( <i>I</i> )] | 0.0597                                | 0.0602                                |
| <i>wR</i> <sub>2</sub> (all data)                  | 0.1240                                | 0.0922                                |
| Goodness of fit on <i>F</i> <sup>2</sup>           | 0.813                                 | 0.911                                 |
| CCDC numbers                                       | 2070825                               | 2070827                               |

**Table S4.** Selected bond lengths (Å) and angles (°) for **1**

|              |            |             |            |
|--------------|------------|-------------|------------|
| Dy1-Dy1'     | 3.9199(5)  | Dy1-O6      | 2.3033(18) |
| Dy1-O3       | 2.3087(17) | Dy1-O1      | 2.513(2)   |
| Dy1-O7'      | 2.2830(17) | Dy1-O2      | 2.3293(17) |
| Dy1-O7       | 2.3130(18) | Dy1-O4      | 2.5452(19) |
| Dy1-O5       | 2.335(2)   | O7-Dy1'     | 2.2830(17) |
| O3-Dy1-Dy1'  | 104.78(5)  | O5-Dy1-Dy1' | 170.76(5)  |
| O3-Dy1-O7    | 77.96(6)   | O5-Dy1-O1   | 88.13(8)   |
| O3-Dy1-O5    | 84.32(7)   | O5-Dy1-O4   | 90.65(8)   |
| O3-Dy1-O1    | 129.96(6)  | O6-Dy1-Dy1' | 98.27(5)   |
| O3-Dy1-O2    | 66.43(6)   | O6-Dy1-O3   | 137.24(7)  |
| O3-Dy1-O4    | 63.24(6)   | O6-Dy1-O7   | 129.38(6)  |
| O7-Dy1-Dy1'  | 31.24(4)   | O6-Dy1-O5   | 73.50(7)   |
| O7'-Dy1-Dy1' | 31.70(4)   | O6-Dy1-O1   | 86.13(7)   |
| O7'-Dy1-O3   | 130.49(7)  | O6-Dy1-O2   | 142.86(7)  |
| O7'-Dy1-O7   | 62.94(7)   | O6-Dy1-O4   | 80.60(7)   |
| O7-Dy1-O5    | 157.09(6)  | O1-Dy1-Dy1' | 87.11(5)   |
| O7'-Dy1-O5   | 139.60(6)  | O1-Dy1-O4   | 166.46(6)  |
| O7'-Dy1-O6   | 66.67(6)   | O2-Dy1-Dy1' | 100.96(4)  |
| O7'-Dy1-O1   | 82.84(7)   | O2-Dy1-O5   | 83.96(7)   |
| O7-Dy1-O1    | 92.16(7)   | O2-Dy1-O1   | 63.59(6)   |
| O7-Dy1-O2    | 75.73(6)   | O2-Dy1-O4   | 129.67(6)  |
| O7'-Dy1-O2   | 125.17(6)  | O4-Dy1-Dy1' | 92.12(5)   |
| O7-Dy1-O4    | 94.18(7)   | Dy1'-O7-Dy1 | 117.06(7)  |
| O7'-Dy1-O4   | 89.41(7)   |             |            |

**Table S5.** Selected bond lengths (Å) and angles (°) for **2**

|              |            |              |            |
|--------------|------------|--------------|------------|
| Dy1-Dy1'     | 3.9119(6)  | Dy1-O7'      | 2.261(2)   |
| Dy1-O6'      | 2.312(3)   | Dy1-O7       | 2.324(3)   |
| Dy1-O3       | 2.321(2)   | Dy1-O1       | 2.520(3)   |
| Dy1-O2       | 2.321(2)   | Dy1-O4       | 2.548(3)   |
| Dy1-O5       | 2.339(3)   |              |            |
| O6'-Dy1-Dy1' | 99.36(6)   | O5-Dy1-O1    | 89.27(11)  |
| O6'-Dy1-O3   | 137.33(9)  | O5-Dy1-O4    | 89.72(11)  |
| O6'-Dy1-O2   | 141.64(10) | O7-Dy1-Dy1'  | 30.97(6)   |
| O6'-Dy1-O5   | 75.20(9)   | O7'-Dy1-Dy1' | 31.93(6)   |
| O6'-Dy1-O7   | 130.21(9)  | O7'-Dy1-O6'  | 67.52(9)   |
| O6'-Dy1-O1   | 85.13(9)   | O7'-Dy1-O3   | 129.91(9)  |
| O6'-Dy1-O4   | 81.35(9)   | O7'-Dy1-O2   | 124.95(9)  |
| O3-Dy1-Dy1'  | 103.90(7)  | O7-Dy1-O5    | 154.57(9)  |
| O3-Dy1-O2    | 67.08(8)   | O7'-Dy1-O5   | 142.48(9)  |
| O3-Dy1-O5    | 81.50(10)  | O7'-Dy1-O7   | 62.91(10)  |
| O3-Dy1-O7    | 77.31(9)   | O7-Dy1-O1    | 93.72(9)   |
| O3-Dy1-O1    | 130.21(8)  | O7'-Dy1-O1   | 83.65(9)   |
| O3-Dy1-O4    | 63.10(8)   | O7'-Dy1-O4   | 88.83(9)   |
| O2-Dy1-Dy1'  | 100.85(6)  | O7-Dy1-O4    | 93.07(10)  |
| O2-Dy1-O5    | 82.84(10)  | O1-Dy1-Dy1'  | 88.55(7)   |
| O2-Dy1-O7    | 76.08(9)   | O1-Dy1-O4    | 166.25(9)  |
| O2-Dy1-O1    | 63.24(8)   | O4-Dy1-Dy1'  | 91.14(7)   |
| O2-Dy1-O4    | 130.18(8)  | Dy1'-O7-Dy1  | 117.10(10) |
| O5-Dy1-Dy1'  | 174.29(7)  |              |            |

**Table S6.** Selected bond lengths (Å) and angles (°) for **3**

|            |            |             |            |
|------------|------------|-------------|------------|
| Dy1-O2     | 2.3206(15) | Dy1-O1      | 2.5351(17) |
| Dy1-O6'    | 2.2915(16) | Dy1-O7'     | 2.2674(16) |
| Dy1-O3     | 2.3342(15) | Dy1-O7      | 2.3141(15) |
| Dy1-O5     | 2.3716(17) |             |            |
| O2-Dy1-O3  | 67.20(5)   | O7'-Dy1-O2  | 126.61(6)  |
| O2-Dy1-O5  | 83.44(6)   | O7-Dy1-O2   | 77.54(6)   |
| O2-Dy1-O1  | 63.07 (5)  | O7'-Dy1-O6' | 67.18(6)   |
| O6'-Dy1-O2 | 140.36(6)  | O7'-Dy1-O3  | 129.20(6)  |
| O6'-Dy1-O3 | 138.03(6)  | O7-Dy1-O3   | 77.06(6)   |
| O6'-Dy1-O5 | 72.58(6)   | O7-Dy1-O5   | 157.49(6)  |
| O6'-Dy1-O1 | 84.74(6)   | O7'-Dy1-O5  | 139.56(6)  |
| O6'-Dy1-O7 | 129.93(6)  | O7'-Dy1-O1  | 84.19(6)   |
| O3-Dy1-O5  | 84.59(6)   | O7-Dy1-O1   | 93.51(6)   |
| O3-Dy1-O1  | 130.25(5)  | O7'-Dy1-O7  | 62.88(6)   |
| O5-Dy1-O1  | 88.43(6)   |             |            |

**Table S7.** Selected bond lengths (Å) and angles (°) for **4**

|              |            |              |            |
|--------------|------------|--------------|------------|
| Dy1-Dy1'     | 3.8968(8)  | Dy1-O6       | 2.308(5)   |
| Dy1-O1'      | 2.311(5)   | O1-Dy1'      | 2.310(5)   |
| Dy1-O3'      | 2.322(5)   | O3-Dy1'      | 2.322(5)   |
| Dy1-O3       | 2.258(5)   | O2-Dy1'      | 2.297(5)   |
| Dy1-O2'      | 2.297(5)   | O4-Dy1'      | 2.530(5)   |
| Dy1-O4'      | 2.530(5)   |              |            |
| O1'-Dy1-Dy1' | 104.23(12) | O2'-Dy1-Dy1' | 101.80(14) |
| O1'-Dy1-O3'  | 76.96(17)  | O2'-Dy1-O1'  | 67.52(18)  |
| O1'-Dy1-O4'  | 63.43(17)  | O2'-Dy1-O3'  | 77.58(19)  |
| O3-Dy1-Dy1'  | 32.19(12)  | O2'-Dy1-O4'  | 130.95(18) |
| O3'-Dy1-Dy1' | 31.20(11)  | O2'-Dy1-O6   | 140.9(2)   |
| O3-Dy1-O1'   | 131.01(17) | O4'-Dy1-Dy1' | 89.62(13)  |
| O3-Dy1-O3'   | 63.4(2)    | O6-Dy1-Dy1'  | 98.91(13)  |
| O3-Dy1-O2'   | 125.04(19) | O6-Dy1-O1'   | 137.30(19) |
| O3-Dy1-O4'   | 88.51(19)  | O6-Dy1-O3'   | 129.88(17) |
| O3'-Dy1-O4'  | 90.82(19)  | O6-Dy1-O4'   | 81.6(2)    |
| O3-Dy1-O6    | 66.93(17)  | Dy1-O3-Dy1'  | 116.6(2)   |



**Table S8.** Selected bond lengths (Å) and angles (°) for **5**

|              |            |              |            |
|--------------|------------|--------------|------------|
| Dy1-Dy1'     | 3.9190(4)  | Dy1-O2'      | 2.327(2)   |
| Dy1-O5'      | 2.323(2)   | Dy1-O7       | 2.393(3)   |
| Dy1-O5       | 2.274(2)   | Dy1-O3'      | 2.566(3)   |
| Dy1-O6       | 2.296(2)   | Dy1-O4'      | 2.535(3)   |
| Dy1-O1'      | 2.318(2)   |              |            |
| O5'-Dy1-Dy1' | 31.15(6)   | O6-Dy1-O4'   | 85.20(10)  |
| O5-Dy1-Dy1'  | 31.89(6)   | O1'-Dy1-Dy1' | 102.68(6)  |
| O5-Dy1-O5'   | 63.05(10)  | O1'-Dy1-O5'  | 77.52(9)   |
| O5-Dy1-O6    | 67.03(9)   | O1'-Dy1-O2'  | 67.32(9)   |
| O5-Dy1-O1'   | 126.80(9)  | O1'-Dy1-O7   | 83.00(10)  |
| O5'-Dy1-O2'  | 77.13(9)   | O1'-Dy1-O3'  | 129.80(9)  |
| O5-Dy1-O2'   | 129.22(9)  | O1'-Dy1-O4'  | 63.18(9)   |
| O5'-Dy1-O7   | 157.00(9)  | O2'-Dy1-Dy1' | 103.59(7)  |
| O5-Dy1-O7    | 139.88(9)  | O2'-Dy1-O7   | 84.19(9)   |
| O5'-Dy1-O3'  | 95.41(9)   | O2'-Dy1-O3'  | 62.69(9)   |
| O5-Dy1-O3'   | 89.94(10)  | O2'-Dy1-O4'  | 130.50(9)  |
| O5'-Dy1-O4'  | 91.59(9)   | O7-Dy1-Dy1'  | 171.65(7)  |
| O5-Dy1-O4'   | 82.84(10)  | O7-Dy1-O3'   | 87.70(10)  |
| O6-Dy1-Dy1'  | 98.88(7)   | O7-Dy1-O4'   | 90.41(10)  |
| O6-Dy1-O5'   | 129.98(9)  | O3'-Dy1-Dy1' | 93.17(7)   |
| O6-Dy1-O1'   | 140.11(10) | O4'-Dy1-Dy1' | 86.80(7)   |
| O6-Dy1-O2'   | 138.13(9)  | O4'-Dy1-O3'  | 166.40(9)  |
| O6-Dy1-O7    | 73.02(10)  | Dy1-O5-Dy1'  | 116.95(10) |
| O6-Dy1-O3'   | 81.36(9)   |              |            |

**Table S9.** Selected bond lengths (Å) and angles (°) for **6**

|              |           |              |           |
|--------------|-----------|--------------|-----------|
| Dy1-Dy1'     | 3.8755(3) | Dy1-O6       | 2.316(2)  |
| Dy1-O5       | 2.272(2)  | Dy1-O4'      | 2.510(2)  |
| Dy1-O5'      | 2.316(2)  | Dy1-O3'      | 2.484(2)  |
| Dy1-O1'      | 2.325(2)  | Dy1-O7       | 2.380(2)  |
| Dy1-O2'      | 2.332(2)  | O5-Dy1'      | 2.321(3)  |
| O5'-Dy1-Dy1' | 32.02(5)  | O2'-Dy1-Dy1' | 103.54(5) |
| O5-Dy1-Dy1'  | 32.72(5)  | O2'-Dy1-O4'  | 132.03(8) |
| O5-Dy1-O5'   | 64.75(9)  | O2'-Dy1-O3'  | 65.54(8)  |
| O5-Dy1-O1'   | 122.48(8) | O2'-Dy1-O7   | 83.46(9)  |
| O5'-Dy1-O1'  | 76.66(8)  | O6-Dy1-Dy1'  | 99.14 (6) |
| O5-Dy1-O2'   | 131.88(8) | O6-Dy1-O5'   | 130.50(8) |
| O5'-Dy1-O2'  | 74.74(8)  | O6-Dy1-O1'   | 142.23(9) |
| O5-Dy1-O6    | 66.98(8)  | O6-Dy1-O2'   | 136.86(8) |
| O5-Dy1-O4'   | 82.40(9)  | O6-Dy1-O4'   | 82.36(9)  |
| O5'-Dy1-O4'  | 101.37(8) | O6-Dy1-O3'   | 78.63(9)  |
| O5-Dy1-O3'   | 88.95(9)  | O6-Dy1-O7    | 73.82(8)  |
| O5'-Dy1-O3'  | 90.08(9)  | O4'-Dy1-Dy1' | 92.31(6)  |
| O5-Dy1-O7    | 139.93(8) | O3'-Dy1-Dy1' | 89.43(6)  |
| O5'-Dy1-O7   | 155.30(8) | O3'-Dy1-O4'  | 160.95(8) |
| O1'-Dy1-Dy1' | 100.19(6) | O7-Dy1-Dy1'  | 172.60(6) |
| O1'-Dy1-O2'  | 67.95(8)  | O7-Dy1-O4'   | 84.56(9)  |
| O1'-Dy1-O4'  | 64.76(8)  | O7-Dy1-O3'   | 91.37(9)  |
| O1'-Dy1-O3'  | 133.47(8) | Dy1-O5-Dy1'  | 115.25(9) |
| O1'-Dy1-O7   | 84.56(9)  |              |           |

**Table S10.** Selected bond lengths (Å) and angles (°) for **7**

|              |            |              |            |
|--------------|------------|--------------|------------|
| Yb1-Yb1'     | 3.8856(18) | Yb1-O5       | 2.242(5)   |
| Yb1-O2'      | 2.257(5)   | Yb1-O7       | 2.283(6)   |
| Yb1-O6       | 2.236(5)   | Yb1-O3'      | 2.480(5)   |
| Yb1-O1'      | 2.256(5)   | Yb1-O4'      | 2.508(5)   |
| Yb1-O5'      | 2.303(6)   |              |            |
| O2'-Yb1-Yb1' | 101.20(15) | O5'-Yb1-Yb1' | 30.79(13)  |
| O2'-Yb1-O5'  | 76.4(2)    | O1'-Yb1-O4'  | 62.63(17)  |
| O2'-Yb1-O7   | 82.7(2)    | O5-Yb1-Yb1'  | 31.71(15)  |
| O2'-Yb1-O3'  | 64.62(18)  | O5-Yb1-O2'   | 125.3(2)   |
| O2'-Yb1-O4'  | 129.99(17) | O5-Yb1-O1'   | 130.6(2)   |
| O6-Yb1-Yb1'  | 99.71(14)  | O5-Yb1-O5'   | 62.5(2)    |
| O6-Yb1-O2'   | 141.9(2)   | O5-Yb1-O7    | 141.0(2)   |
| O6-Yb1-O1'   | 135.5(2)   | O5'-Yb1-O3'  | 93.1(2)    |
| O6-Yb1-O5    | 68.1(2)    | O5-Yb1-O3'   | 83.32(19)  |
| O6-Yb1-O5'   | 130.36(19) | O5'-Yb1-O4'  | 94.7(2)    |
| O6-Yb1-O7    | 73.43(19)  | O5-Yb1-O4'   | 89.77(18)  |
| O6-Yb1-O3'   | 85.0(2)    | O7-Yb1-Yb1'  | 172.17(14) |
| O6-Yb1-O4'   | 80.09(18)  | O7-Yb1-O5'   | 156.20(19) |
| O1'-Yb1-Yb1' | 105.18(16) | O7-Yb1-O3'   | 88.2(2)    |
| O1'-Yb1-O2'  | 67.37(18)  | O7-Yb1-O4'   | 89.9(2)    |
| O1'-Yb1-O5'  | 78.9(2)    | O3'-Yb1-Yb1' | 87.41(16)  |
| O1'-Yb1-O7   | 82.6(2)    | O3'-Yb1-O4'  | 164.84(18) |
| O1'-Yb1-O3'  | 131.86(18) | O4'-Yb1-Yb1' | 92.66(15)  |

**Table S11.** Selected bond lengths (Å) and angles (°) for **8**

|              |            |              |            |
|--------------|------------|--------------|------------|
| Yb1-Yb1'     | 3.8139(9)  | Yb1-O3'      | 2.501(5)   |
| Yb1-O2'      | 2.268(5)   | Yb1-O7       | 2.301(4)   |
| Yb1-O5'      | 2.258(4)   | O2-Yb1'      | 2.268(5)   |
| Yb1-O5       | 2.217(4)   | O5-Yb1'      | 2.258(4)   |
| Yb1-O1'      | 2.267(5)   | O1-Yb1'      | 2.267(5)   |
| Yb1-O4'      | 2.482(5)   | O4-Yb1'      | 2.482(5)   |
| Yb1-O6       | 2.236(5)   | O3-Yb1'      | 2.501(5)   |
| O2'-Yb1-Yb1' | 104.34(11) | O1'-Yb1-O2'  | 67.84(18)  |
| O2'-Yb1-O4'  | 131.56(18) | O1'-Yb1-O4'  | 63.78(17)  |
| O2'-Yb1-O3'  | 63.51(18)  | O1'-Yb1-O3'  | 131.31(17) |
| O2'-Yb1-O7   | 82.89(16)  | O1'-Yb1-O7   | 82.46(18)  |
| O5-Yb1-Yb1'  | 31.87(11)  | O4'-Yb1-Yb1' | 89.07(10)  |
| O5'-Yb1-Yb1' | 31.22(12)  | O4'-Yb1-O3'  | 164.37(17) |
| O5'-Yb1-O2'  | 77.98(15)  | O6-Yb1-Yb1'  | 99.66(11)  |
| O5-Yb1-O2'   | 129.66(17) | O6-Yb1-O2'   | 137.40(17) |
| O5-Yb1-O5'   | 63.1(2)    | O6-Yb1-O5'   | 130.85(16) |
| O5'-Yb1-O1'  | 78.06(17)  | O6-Yb1-O1'   | 138.66(18) |
| O5-Yb1-O1'   | 127.30(17) | O6-Yb1-O4'   | 82.87(19)  |
| O5'-Yb1-O4'  | 94.19(17)  | O6-Yb1-O3'   | 81.80(18)  |
| O5-Yb1-O4'   | 84.12(18)  | O6-Yb1-O7    | 72.48(18)  |
| O5-Yb1-O6    | 67.82(16)  | O3'-Yb1-Yb1' | 90.52(10)  |
| O5'-Yb1-O3'  | 93.53(17)  | O7-Yb1-Yb1'  | 172.01(13) |
| O5-Yb1-O3'   | 87.30(18)  | O7-Yb1-O4'   | 88.54(17)  |
| O5-Yb1-O7    | 140.20(17) | O7-Yb1-O3'   | 89.73(17)  |
| O5'-Yb1-O7   | 156.67(18) | Yb1-O5-Yb1'  | 116.9(2)   |
| O1'-Yb1-Yb1' | 103.28(10) |              |            |

**Table S12.** Continuous Shape Measures (CSHMs) of the coordination geometry for Dy(III) ion in compounds **1–8** (*S* values calculated with the Shape program). The *S* values indicated the proximity to the ideal polyhedron, thus, *S* = 0 corresponds to the non-distorted polyhedron. The three closer ideal geometries to the real complexes are listed and below are the symmetry and description for each polyhedron.

|           |      |       |         |    |     |                                |
|-----------|------|-------|---------|----|-----|--------------------------------|
| Complex 1 | Dy1  | 2.867 | TDD-8   | 6  | D2d | Triangular dodecahedron        |
|           |      | 3.966 | BTPR-8  | 10 | C2v | Biaugmented trigonal prism     |
|           |      | 4.790 | JSD-8   | 11 | D2d | Snub diphenoid J84             |
|           | Dy1' | 2.867 | TDD-8   | 6  | D2d | Triangular dodecahedron        |
|           |      | 3.966 | BTPR-8  | 10 | C2v | Biaugmented trigonal prism     |
|           |      | 4.790 | JSD-8   | 11 | D2d | Snub diphenoid J84             |
| Complex 2 | Dy1  | 2.617 | TDD-8   | 6  | D2d | Triangular dodecahedron        |
|           |      | 4.568 | JBTPR-8 | 9  | C2v | Biaugmented trigonal prism J50 |
|           |      | 3.707 | BTPR-8  | 10 | D2d | Biaugmented trigonal prism     |
|           | Dy1' | 2.617 | TDD-8   | 6  | D2d | Triangular dodecahedron        |
|           |      | 4.568 | JBTPR-8 | 9  | C2v | Biaugmented trigonal prism J50 |
|           |      | 3.707 | BTPR-8  | 10 | D2d | Biaugmented trigonal prism     |
| Complex 3 | Dy1  | 2.842 | TDD-8   | 6  | D2d | Triangular dodecahedron        |
|           |      | 4.893 | JBTPR-8 | 9  | C2v | Biaugmented trigonal prism J50 |
|           |      | 3.960 | BTPR-8  | 10 | D2d | Biaugmented trigonal prism     |
|           | Dy1' | 2.842 | TDD-8   | 6  | D2d | Triangular dodecahedron        |
|           |      | 4.893 | JBTPR-8 | 9  | C2v | Biaugmented trigonal prism J50 |
|           |      | 3.960 | BTPR-8  | 10 | D2d | Biaugmented trigonal prism     |
| Complex 4 | Dy1  | 2.652 | TDD-8   | 6  | D2d | Triangular dodecahedron        |
|           |      | 4.425 | JBTPR-8 | 9  | C2v | Biaugmented trigonal prism J50 |
|           |      | 3.511 | BTPR-8  | 10 | D2d | Biaugmented trigonal prism     |
|           | Dy1' | 2.652 | TDD-8   | 6  | D2d | Triangular dodecahedron        |
|           |      | 4.425 | JBTPR-8 | 9  | C2v | Biaugmented trigonal prism J50 |
|           |      | 3.511 | BTPR-8  | 10 | D2d | Biaugmented trigonal prism     |
| Complex 5 | Dy1  | 2.866 | TDD-8   | 6  | D2d | Triangular dodecahedron        |
|           |      | 4.936 | JBTPR-8 | 9  | C2v | Biaugmented trigonal prism J50 |
|           |      | 3.900 | BTPR-8  | 10 | D2d | Biaugmented trigonal prism     |
|           | Dy1' | 2.866 | TDD-8   | 6  | D2d | Triangular dodecahedron        |
|           |      | 4.937 | JBTPR-8 | 9  | C2v | Biaugmented trigonal prism J50 |
|           |      | 3.900 | BTPR-8  | 10 | D2d | Biaugmented trigonal prism     |
| Complex 6 | Dy1  | 2.491 | TDD-8   | 6  | D2d | Triangular dodecahedron        |
|           |      | 3.583 | JBTPR-8 | 9  | C2v | Biaugmented trigonal prism J50 |
|           |      | 2.658 | BTPR-8  | 10 | D2d | Biaugmented trigonal prism     |
|           | Dy1' | 2.491 | TDD-8   | 6  | D2d | Triangular dodecahedron        |
|           |      | 3.583 | JBTPR-8 | 9  | C2v | Biaugmented trigonal prism J50 |
|           |      | 2.658 | BTPR-8  | 10 | D2d | Biaugmented trigonal prism     |
| Complex 7 | Yb1  | 2.651 | TDD-8   | 6  | D2d | Triangular dodecahedron        |
|           |      | 4.750 | JBTPR-8 | 9  | C2v | Biaugmented trigonal prism J50 |
|           |      | 3.768 | BTPR-8  | 10 | D2d | Biaugmented trigonal prism     |
|           | Yb1' | 2.651 | TDD-8   | 6  | D2d | Triangular dodecahedron        |

|                  |      |       |         |    |     |                                |
|------------------|------|-------|---------|----|-----|--------------------------------|
|                  |      | 4.750 | JBTPR-8 | 9  | C2v | Biaugmented trigonal prism J50 |
|                  |      | 3.768 | BTPR-8  | 10 | D2d | Biaugmented trigonal prism     |
| Complex <b>8</b> | Yb1  | 2.506 | TDD-8   | 6  | D2d | Triangular dodecahedron        |
|                  |      | 4.660 | JBTPR-8 | 9  | C2v | Biaugmented trigonal prism J50 |
|                  |      | 3.683 | BTPR-8  | 10 | D2d | Biaugmented trigonal prism     |
|                  | Yb1' | 2.506 | TDD-8   | 6  | D2d | Triangular dodecahedron        |
|                  |      | 4.660 | JBTPR-8 | 9  | C2v | Biaugmented trigonal prism J50 |
|                  |      | 3.683 | BTPR-8  | 10 | D2d | Biaugmented trigonal prism     |

**Table S13.** Best fitted parameters ( $\chi_T$ ,  $\chi_S$ ,  $\tau$  and  $\alpha$ ) with the extended Debye model for compound **1** under 0 Oe in the temperature range 2–9.5 K.

| T/ K | $\chi_S / \text{cm}^3 \text{mol}^{-1}$ | $\chi_T / \text{cm}^3 \text{mol}^{-1}$ | $\tau/\text{s}$ | $\alpha$ | R                     |
|------|----------------------------------------|----------------------------------------|-----------------|----------|-----------------------|
| 2    | 5.84987                                | 9.86892                                | 0.00366         | 0.30000  | $7.82 \times 10^{-4}$ |
| 2.5  | 5.28413                                | 8.37000                                | 0.00335         | 0.30000  | $6.16 \times 10^{-4}$ |
| 3    | 4.90000                                | 7.40000                                | 0.00326         | 0.27784  | $6.78 \times 10^{-4}$ |
| 3.5  | 4.40002                                | 6.71220                                | 0.00298         | 0.28922  | $5.83 \times 10^{-4}$ |
| 4    | 3.90000                                | 6.10490                                | 0.00242         | 0.30000  | $4.00 \times 10^{-4}$ |
| 4.5  | 3.53882                                | 5.59617                                | 0.00200         | 0.29973  | $2.85 \times 10^{-4}$ |
| 5    | 3.35000                                | 5.13741                                | 0.00179         | 0.25909  | $2.44 \times 10^{-4}$ |
| 5.5  | 3.22086                                | 4.75035                                | 0.00162         | 0.19678  | $2.90 \times 10^{-4}$ |
| 6    | 2.80976                                | 4.44778                                | 0.00113         | 0.26674  | $5.77 \times 10^{-4}$ |
| 6.5  | 2.54415                                | 4.14324                                | 0.00082         | 0.28193  | $2.59 \times 10^{-4}$ |
| 7    | 2.44250                                | 3.88891                                | 0.00068         | 0.25440  | $3.15 \times 10^{-4}$ |
| 7.5  | 2.30636                                | 3.67088                                | 0.00056         | 0.24764  | $5.17 \times 10^{-5}$ |
| 8    | 2.13317                                | 3.50049                                | 0.00046         | 0.29093  | $9.44 \times 10^{-5}$ |
| 8.5  | 2.15601                                | 3.29499                                | 0.00044         | 0.23203  | $7.76 \times 10^{-5}$ |
| 9    | 1.97766                                | 3.13108                                | 0.00033         | 0.26334  | $8.57 \times 10^{-5}$ |
| 9.5  | 1.85723                                | 3.00089                                | 0.00027         | 0.29782  | $9.78 \times 10^{-5}$ |

**Table S14.** Best fitted parameters ( $\chi_T$ ,  $\chi_S$ ,  $\tau$  and  $\alpha$ ) with the extended Debye model for compound **2** under 0 Oe in the temperature range 2–11K.

| T/ K | $\chi_S / \text{cm}^3 \text{mol}^{-1}$ | $\chi_T / \text{cm}^3 \text{mol}^{-1}$ | $\tau/\text{s}$ | $\alpha$ | R                     |
|------|----------------------------------------|----------------------------------------|-----------------|----------|-----------------------|
| 2    | 7.81179                                | 8.61841                                | 0.01047         | 0.29982  | $1.56 \times 10^{-4}$ |
| 3    | 5.85000                                | 6.65015                                | 0.01500         | 0.29990  | $1.54 \times 10^{-4}$ |
| 4    | 4.67799                                | 5.30000                                | 0.00974         | 0.30000  | $1.28 \times 10^{-4}$ |
| 5    | 3.87372                                | 4.40121                                | 0.00575         | 0.27658  | $1.31 \times 10^{-4}$ |
| 6    | 3.30793                                | 3.78522                                | 0.00363         | 0.27477  | $1.54 \times 10^{-4}$ |
| 7    | 2.89154                                | 3.29376                                | 0.00230         | 0.23742  | $1.68 \times 10^{-4}$ |
| 8    | 2.59427                                | 2.91290                                | 0.00152         | 0.16754  | $2.07 \times 10^{-4}$ |
| 9    | 2.34072                                | 2.62104                                | 0.00103         | 0.15740  | $2.18 \times 10^{-4}$ |
| 10   | 2.19199                                | 2.38019                                | 0.00100         | 0.07319  | $2.29 \times 10^{-4}$ |
| 11   | 1.99880                                | 2.18395                                | 0.00065         | 0.16011  | $2.15 \times 10^{-4}$ |

**Table S15.** Best fitted parameters ( $\chi_T$ ,  $\chi_S$ ,  $\tau$  and  $\alpha$ ) with the extended Debye model for compound **3** under 0 Oe in the temperature range 2–7 K.

| T/ K | $\chi_S / \text{cm}^3 \text{mol}^{-1}$ | $\chi_T / \text{cm}^3 \text{mol}^{-1}$ | $\tau/\text{s}$ | $\alpha$ | R                     |
|------|----------------------------------------|----------------------------------------|-----------------|----------|-----------------------|
| 2    | 1.09661                                | 7.70000                                | 0.00027         | 0.12955  | $1.02 \times 10^{-4}$ |
| 2.5  | 0.62992                                | 7.10236                                | 0.00025         | 0.14708  | $8.87 \times 10^{-5}$ |
| 3    | 1.29720                                | 6.47445                                | 0.00030         | 0.08278  | $3.74 \times 10^{-5}$ |
| 3.5  | 0.92957                                | 5.92082                                | 0.00028         | 0.10413  | $1.96 \times 10^{-5}$ |
| 4    | 0.79121                                | 5.42496                                | 0.00027         | 0.10357  | $3.13 \times 10^{-5}$ |
| 4.5  | 0.80063                                | 5.00164                                | 0.00026         | 0.09093  | $2.32 \times 10^{-5}$ |
| 5    | 0.95616                                | 4.62177                                | 0.00026         | 0.05646  | $1.20 \times 10^{-5}$ |
| 5.5  | 0.80902                                | 4.30305                                | 0.00023         | 0.05085  | $2.83 \times 10^{-5}$ |
| 6    | 0.84285                                | 4.01162                                | 0.00020         | 0.02719  | $2.11 \times 10^{-5}$ |
| 6.5  | 1.08011                                | 3.76826                                | 0.00020         | 0.00005  | $5.65 \times 10^{-5}$ |
| 7    | 0.90284                                | 3.53849                                | 0.00016         | 0.00069  | $2.50 \times 10^{-5}$ |

**Table S16.** Best fitted parameters ( $\chi_T$ ,  $\chi_S$ ,  $\tau$  and  $\alpha$ ) with the extended Debye model for compound **4** under 0 Oe in the temperature range 2–7 K.

| T/ K | $\chi_S / \text{cm}^3 \text{mol}^{-1}$ | $\chi_T / \text{cm}^3 \text{mol}^{-1}$ | $\tau/\text{s}$ | $\alpha$ | R                     |
|------|----------------------------------------|----------------------------------------|-----------------|----------|-----------------------|
| 2    | 0.11386                                | 6.10677                                | 0.01210         | 0.22072  | $4.34 \times 10^{-4}$ |
| 2.5  | 0.14213                                | 5.64939                                | 0.01100         | 0.20741  | $4.34 \times 10^{-4}$ |
| 3    | 0.15494                                | 5.16657                                | 0.00958         | 0.19244  | $4.34 \times 10^{-4}$ |
| 3.5  | 0.03000                                | 4.64991                                | 0.00753         | 0.19211  | $4.34 \times 10^{-4}$ |
| 4    | 0.09436                                | 4.29950                                | 0.00638         | 0.17040  | $4.34 \times 10^{-4}$ |
| 4.5  | 0.08425                                | 3.98375                                | 0.13099         | 0.16479  | $4.34 \times 10^{-4}$ |
| 5    | 0.08316                                | 3.68758                                | 0.00403         | 0.15296  | $4.34 \times 10^{-4}$ |
| 5.5  | 0.07213                                | 3.42829                                | 0.00314         | 0.14373  | $4.34 \times 10^{-4}$ |
| 6    | 0.07095                                | 3.19632                                | 0.00245         | 0.13407  | $4.34 \times 10^{-4}$ |
| 6.5  | 0.05670                                | 2.99631                                | 0.00191         | 0.13252  | $4.34 \times 10^{-4}$ |
| 7    | 0.11390                                | 2.82557                                | 0.00156         | 0.11474  | $4.34 \times 10^{-4}$ |
| 7.5  | 0.11900                                | 2.66408                                | 0.00125         | 0.10838  | $4.34 \times 10^{-4}$ |
| 8    | 0.01598                                | 2.52742                                | 0.00097         | 0.13446  | $4.34 \times 10^{-4}$ |
| 8.5  | 0.00596                                | 2.39752                                | 0.00078         | 0.13383  | $4.34 \times 10^{-4}$ |
| 9    | 0.25025                                | 2.29944                                | 0.00056         | 0.20274  | $4.34 \times 10^{-4}$ |
| 9.5  | 0.01110                                | 2.17904                                | 0.00053         | 0.13567  | $4.34 \times 10^{-4}$ |
| 10   | 0.04206                                | 2.08103                                | 0.00045         | 0.12309  | $4.34 \times 10^{-4}$ |
| 10.5 | 0.04973                                | 1.99264                                | 0.00038         | 0.12224  | $4.34 \times 10^{-4}$ |
| 11   | 0.04610                                | 1.91847                                | 0.00032         | 0.12799  | $4.34 \times 10^{-4}$ |
| 11.5 | 0.05000                                | 1.84432                                | 0.00027         | 0.12397  | $4.34 \times 10^{-4}$ |
| 12   | 0.06420                                | 1.77856                                | 0.00020         | 0.15856  | $4.34 \times 10^{-4}$ |



**Table S17.** Best fitted parameters ( $\chi_T$ ,  $\chi_S$ ,  $\tau$  and  $\alpha$ ) with the extended Debye model for compound **5** under 0 Oe in the temperature range 2–12 K.

| T/ K | $\chi_S / \text{cm}^3 \text{mol}^{-1}$ | $\chi_T / \text{cm}^3 \text{mol}^{-1}$ | $\tau/\text{s}$ | $\alpha$ | R                     |
|------|----------------------------------------|----------------------------------------|-----------------|----------|-----------------------|
| 2    | 0.25465                                | 3.64831                                | 0.00207         | 0.17448  | $1.68 \times 10^{-4}$ |
| 2.5  | 0.2537                                 | 3.40059                                | 0.00212         | 0.17366  | $2.63 \times 10^{-4}$ |
| 3    | 0.16347                                | 3.04053                                | 0.00189         | 0.17851  | $3.59 \times 10^{-4}$ |
| 3.5  | 0.20318                                | 2.80232                                | 0.00177         | 0.15593  | $1.85 \times 10^{-4}$ |
| 4    | 0.16162                                | 2.60179                                | 0.00158         | 0.1552   | $3.42 \times 10^{-4}$ |
| 4.5  | 0.22884                                | 2.39573                                | 0.00145         | 0.11603  | $2.98 \times 10^{-4}$ |
| 5    | 0.22249                                | 2.19841                                | 0.00124         | 0.10674  | $3.36 \times 10^{-4}$ |
| 5.5  | 0.19837                                | 2.01482                                | 0.00102         | 0.10355  | $3.87 \times 10^{-4}$ |
| 6    | 0.16546                                | 1.85644                                | 0.00081         | 0.09627  | $4.12 \times 10^{-4}$ |
| 6.5  | 0.18983                                | 1.74675                                | 0.00068         | 0.08629  | $3.49 \times 10^{-4}$ |
| 7    | 0.18776                                | 1.6409                                 | 0.00056         | 0.08395  | $3.95 \times 10^{-4}$ |
| 7.5  | 0.17979                                | 1.54762                                | 0.00046         | 0.08818  | $4.64 \times 10^{-4}$ |
| 8    | 0.18951                                | 1.46776                                | 0.00039         | 0.09152  | $4.61 \times 10^{-4}$ |
| 8.5  | 0.16837                                | 1.39193                                | 0.00031         | 0.11276  | $5.80 \times 10^{-4}$ |
| 9    | 0.15                                   | 1.32661                                | 0.00026         | 0.12319  | $6.75 \times 10^{-4}$ |
| 9.5  | 0.14887                                | 1.26948                                | 0.00021         | 0.13742  | $7.35 \times 10^{-4}$ |
| 10   | 0.10892                                | 1.2154                                 | 0.00017         | 0.17375  | $8.23 \times 10^{-4}$ |
| 10.5 | 0.048                                  | 1.16318                                | 0.00011         | 0.22625  | $9.45 \times 10^{-4}$ |
| 11   | 0.02083                                | 1.11939                                | 0.00008         | 0.26261  | $9.66 \times 10^{-4}$ |
| 11.5 | 0.02616                                | 1.07798                                | 0.00006         | 0.28468  | $8.94 \times 10^{-4}$ |
| 12   | 0.00596                                | 1.03529                                | 0.00004         | 0.29346  | $6.42 \times 10^{-4}$ |

**Table S18.** Best fitted parameters ( $\chi_T$ ,  $\chi_S$ ,  $\tau$  and  $\alpha$ ) with the extended Debye model for compound **6** under 0 Oe in the temperature range 2–12K.

| T/ K | $\chi_S / \text{cm}^3 \text{mol}^{-1}$ | $\chi_T / \text{cm}^3 \text{mol}^{-1}$ | $\tau_1/\text{s}$ | $\alpha_1$ | $\tau_2/\text{s}$ | $\alpha_2$ | $\beta$ | R                     |
|------|----------------------------------------|----------------------------------------|-------------------|------------|-------------------|------------|---------|-----------------------|
| 2    | 0.58538                                | 5.69998                                | 0.00247           | 0.23       | 0.1516            | 0.08993    | 0.6643  | $1.14 \times 10^{-4}$ |
| 2.5  | 0.50647                                | 5.2                                    | 0.00248           | 0.23       | 0.15836           | 0.11845    | 0.68724 | $6.69 \times 10^{-5}$ |
| 3    | 0.44751                                | 4.79894                                | 0.00244           | 0.23       | 0.17083           | 0.15143    | 0.69109 | $4.47 \times 10^{-5}$ |
| 3.5  | 0.40105                                | 4.39311                                | 0.00233           | 0.22997    | 0.16046           | 0.14664    | 0.70321 | $3.49 \times 10^{-5}$ |
| 4    | 0.38159                                | 3.96999                                | 0.00208           | 0.21108    | 0.1191            | 0.13274    | 0.7099  | $3.61 \times 10^{-5}$ |
| 4.5  | 0.37616                                | 3.56528                                | 0.0017            | 0.17607    | 0.07446           | 0.11571    | 0.70998 | $2.95 \times 10^{-5}$ |
| 5    | 0.36301                                | 3.2314                                 | 0.00131           | 0.14276    | 0.04603           | 0.10099    | 0.70998 | $2.37 \times 10^{-5}$ |
| 5.5  | 0.32486                                | 2.99477                                | 0.0098            | 0.13       | 0.02946           | 0.10569    | 0.70995 | $3.23 \times 10^{-5}$ |
| 6    | 0.28061                                | 2.81198                                | 0.0071            | 0.13       | 0.01933           | 0.11814    | 0.71    | $7.23 \times 10^{-5}$ |
| 6.5  | 0.23757                                | 2.64668                                | 0.0051            | 0.13       | 0.0125            | 0.12927    | 0.71    | $1.27 \times 10^{-4}$ |
| 7    | 0.20605                                | 2.50029                                | 0.0037            | 0.13001    | 0.0084            | 0.13311    | 0.70999 | $1.53 \times 10^{-4}$ |
| 7.5  | 0.20009                                | 2.34313                                | 0.0028            | 0.13002    | 0.00559           | 0.13152    | 0.70999 | $1.67 \times 10^{-4}$ |
| 8    | 0.20012                                | 2.20066                                | 0.0021            | 0.13       | 0.0037            | 0.13051    | 0.70998 | $1.52 \times 10^{-4}$ |
| 8.5  | 0.17064                                | 2.10992                                | 0.0015            | 0.1421     | 0.00184           | 0.21136    | 0.66387 | $1.84 \times 10^{-4}$ |
| 9    | 0.20253                                | 1.9516                                 | 0.0012            | 0.13068    | 0.00144           | 0.11051    | 0.70998 | $6.12 \times 10^{-5}$ |
| 9.5  | 0.29949                                | 1.75269                                | 0.0078            | 0.13002    | 0.00001           | 0.06023    | 0.37098 | $4.11 \times 10^{-5}$ |
| 10   | 0.29596                                | 1.67162                                | 0.0022            | 0.16587    | 0.00004           | 0.37386    | 0.70971 | $8.18 \times 10^{-5}$ |
| 10.5 | 0.08802                                | 1.78703                                | 0.0016            | 0.1304     | 0                 | 0.41523    | 0.70534 | $4.33 \times 10^{-5}$ |
| 11   | 0.19063                                | 1.61378                                | 0.0011            | 0.13106    | 0                 | 0.43864    | 0.70298 | $5.66 \times 10^{-5}$ |
| 11.5 | 0.17385                                | 1.55152                                | 0.0012            | 0.13471    | 0.00003           | 0.06591    | 0.31232 | $4.76 \times 10^{-5}$ |
| 12   | 0.14456                                | 1.8073                                 | 0.00004           | 0.13005    | 0                 | 0.41462    | 0.70971 | $3.10 \times 10^{-5}$ |

**Table S19.** The curves are fitted by QTM, Raman and Orbach process for complexes **1-6**.

| complex   | dc field      |                | $q(s^{-1})$          | $C (s^{-1}\cdot K^{-n})$ | $n$                  | $\tau_0 (s)$          | $U_{eff}/k_B (K)$ |
|-----------|---------------|----------------|----------------------|--------------------------|----------------------|-----------------------|-------------------|
| complex 1 | zero dc field | Value          | 0.0057               | 22.2045                  | 1.002                | $1.442\times 10^{-5}$ | 28.34             |
|           |               | Standard Error | $2.45\times 10^{-5}$ | $4.19\times 10^{-1}$     | $1.2\times 10^{-1}$  | $2.47\times 10^{-8}$  | 1.21              |
| complex 2 | zero dc field | Value          | 0.0159               | 0.01865                  | 4.0165               | $4.68\times 10^{-5}$  | 27.61             |
|           |               | Standard Error | $1.21\times 10^{-4}$ | $3.41\times 10^{-4}$     | $2.3\times 10^{-1}$  | $3.46\times 10^{-8}$  | 2.38              |
| complex 3 | zero dc field | Value          | 0.0027               | 0.03897                  | 5.8087               | $9.52\times 10^{-5}$  | 34.21             |
|           |               | Standard Error | $6.54\times 10^{-5}$ | $5.46\times 10^{-4}$     | $5.7\times 10^{-1}$  | $6.48\times 10^{-7}$  | 2.98              |
| complex 4 | zero dc field | Value          | 0.0135               | 0.47243                  | 3.6113               | $9.31\times 10^{-6}$  | 61.23             |
|           |               | Standard Error | $5.16\times 10^{-5}$ | $2.86\times 10^{-3}$     | $4.66\times 10^{-1}$ | $5.73\times 10^{-8}$  | 1.65              |
| complex 5 | zero dc field | Value          | 0.0026               | 19.3645                  | 1.8624               | $6.83\times 10^{-5}$  | 34.54             |
|           |               | Standard Error | $1.91\times 10^{-4}$ | $8.37\times 10^{-2}$     | $3.81\times 10^{-1}$ | $2.39\times 10^{-7}$  | 1.49              |
| complex 6 | zero dc field | Value          | 0.0006               | 10.8342                  | 0.9926               | $9.63\times 10^{-5}$  | 36.03             |
|           |               | Standard Error | $2.79\times 10^{-5}$ | $6.53\times 10^{-2}$     | $8.63\times 10^{-2}$ | $5.52\times 10^{-7}$  | 2.04              |

**Table S20.** The curves are fitted by Raman and Orbach process for complexes **1-6** under applied dc field.

| complex   | dc field         |                | $C (s^{-1}\cdot K^{-n})$ | $n$                  | $\tau_0 (s)$         | $U_{eff}/k_B (K)$ |
|-----------|------------------|----------------|--------------------------|----------------------|----------------------|-------------------|
| complex 1 | 900 Oe dc field  | Value          | 19.8541                  | 1.1201               | $1.58\times 10^{-5}$ | 28.47             |
|           |                  | Standard Error | $5.61\times 10^{-1}$     | $5.31\times 10^{-2}$ | $2.68\times 10^{-7}$ | 1.01              |
| complex 2 | 2100 Oe dc field | Value          | 0.01794                  | 4.0212               | $1.87\times 10^{-6}$ | 26.81             |
|           |                  | Standard Error | $3.27\times 10^{-4}$     | $2.16\times 10^{-1}$ | $4.35\times 10^{-8}$ | 2.47              |
| complex 3 | 800 Oe dc field  | Value          | 0.03464                  | 5.7421               | $3.58\times 10^{-6}$ | 34.74             |
|           |                  | Standard Error | $4.97\times 10^{-4}$     | $3.28\times 10^{-1}$ | $5.36\times 10^{-8}$ | 3.35              |
| complex 4 | 1500 Oe dc field | Value          | 0.50321                  | 3.7465               | $3.53\times 10^{-6}$ | 59.63             |
|           |                  | Standard Error | $2.08\times 10^{-3}$     | $5.76\times 10^{-1}$ | $6.12\times 10^{-8}$ | 1.55              |

|           |                  |                |                       |                       |                       |       |
|-----------|------------------|----------------|-----------------------|-----------------------|-----------------------|-------|
| complex 5 | 1500 Oe dc field | Value          | 21.7173               | 1.8456                | $9.78 \times 10^{-6}$ | 35.25 |
|           |                  | Standard Error | $5.37 \times 10^{-2}$ | $2.34 \times 10^{-1}$ | $4.92 \times 10^{-7}$ | 2.07  |
| complex 6 | 1500 Oe dc field | Value          | 10.8855               | 1.0301                | $6.22 \times 10^{-6}$ | 36.40 |
|           |                  | Standard Error | $7.36 \times 10^{-2}$ | $2.46 \times 10^{-2}$ | $3.57 \times 10^{-8}$ | 3.24  |

**Table S21.** The curves are fitted by Raman and Orbach process for complexes **7** and **8** under applied dc field.

| complex   | dc field         |                | C ( $s^{-1} \cdot K^{-n}$ ) | n                     | $\tau_0$ (s)          | $U_{eff}/k_B$ (K) |
|-----------|------------------|----------------|-----------------------------|-----------------------|-----------------------|-------------------|
| complex 7 | 1100 Oe dc field | Value          | 34.9133                     | 1.5782                | $1.65 \times 10^{-6}$ | 26.06             |
|           |                  | Standard Error | $5.25 \times 10^{-1}$       | $1.67 \times 10^{-1}$ | $3.24 \times 10^{-8}$ | 1.06              |
| complex 8 | 1100 Oe dc field | Value          | 32.8521                     | 1.8309                | $7.16 \times 10^{-8}$ | 40.77             |
|           |                  | Standard Error | $4.83 \times 10^{-1}$       | $2.93 \times 10^{-1}$ | $1.33 \times 10^{-9}$ | 2.34              |

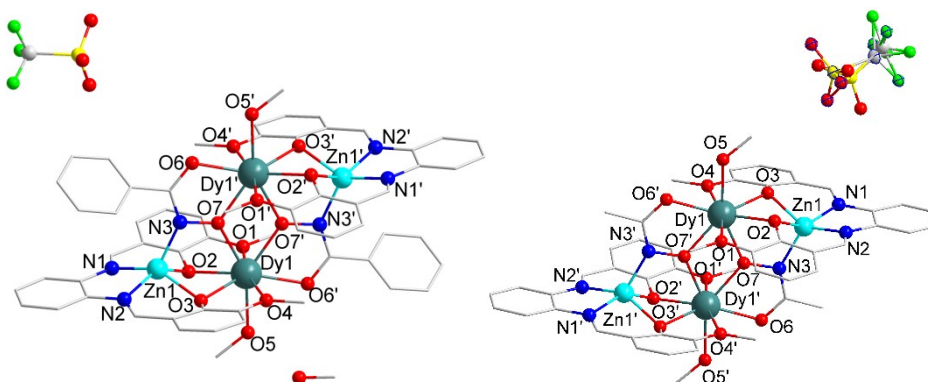

**Fig. S1** Partially labeled molecular structure of complexes **2** (left) and **3** (right). The minor part of the disorder  $CF_3SO_3^{-1}$  is shown as front ellipse in blue line. Color code: Dy (teal), Zn (light blue), O (red), N (blue), C (grey), S (yellow), F (green).

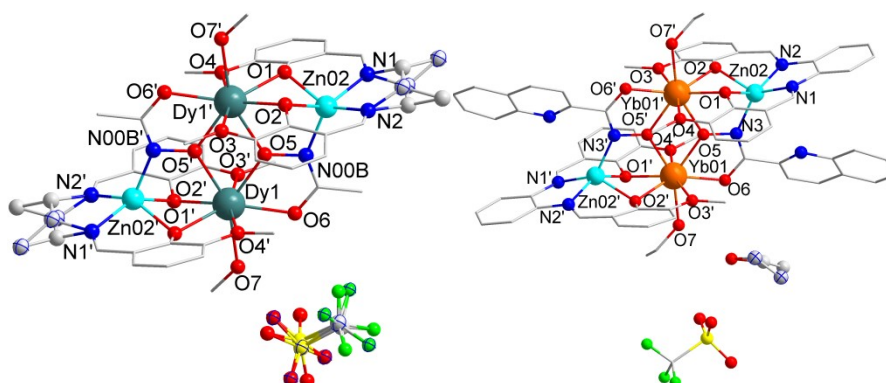

**Fig. S2** Partially labeled molecular structure of complexes **5** (left) and **7** (right). The minor part of the disorder  $\text{CF}_3\text{SO}_3^{-1}$  is shown as front ellipse in blue line. Color code: Dy (teal), Zn (light blue), O (red), N (blue), C (grey), S (yellow), F (green).

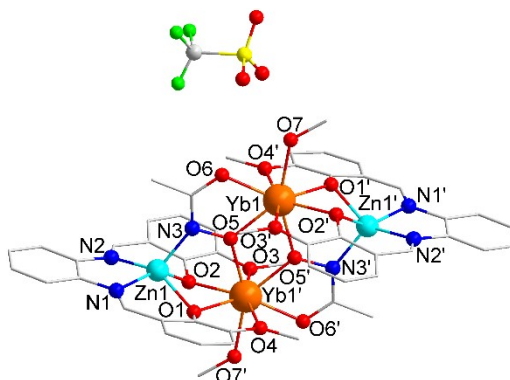

**Fig. S3** Partially labeled molecular structure of complexes **8**. Color code: Dy (teal), Yb (orange), Zn (light blue), O (red), N (blue), C (grey), S (yellow), F (green).

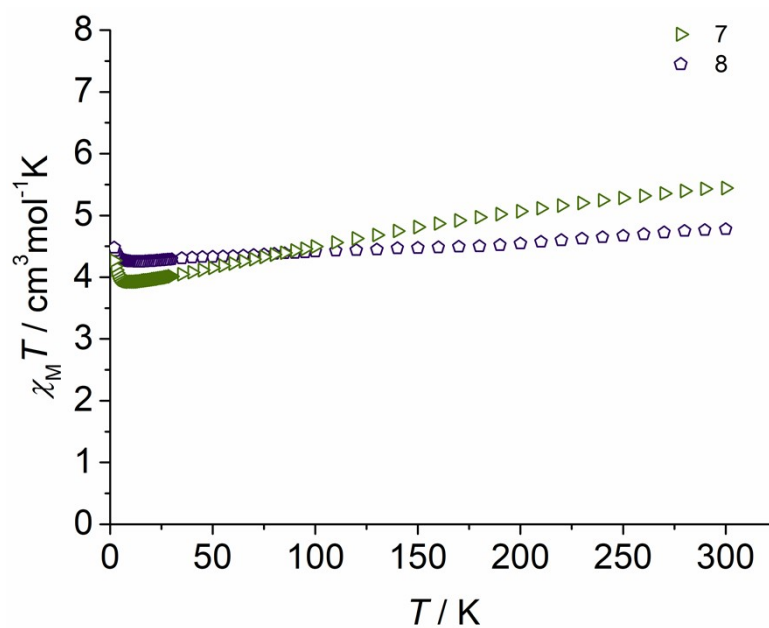

**Fig. S4** Temperature dependence of the magnetic susceptibility  $\chi_M T$  at 1000 Oe for complexes **7** and **8**.

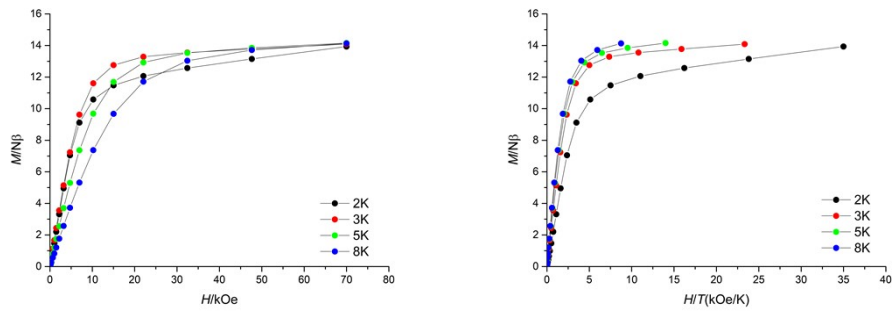

Fig. S5 Field dependences of magnetization in the field range 0–70 kOe and temperature range 2–8 K for 1.

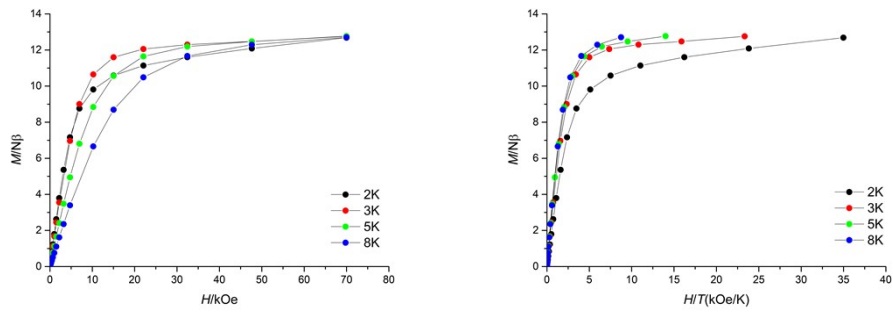

Fig. S6 Field dependences of magnetization in the field range 0–70 kOe and temperature range 2–8 K for 2.

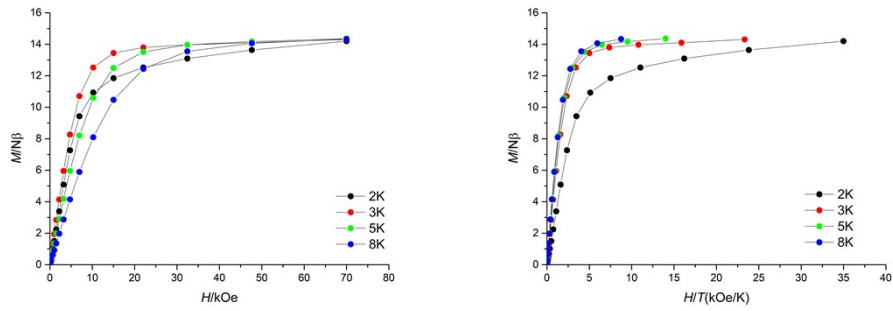

Fig. S7 Field dependences of magnetization in the field range 0–70 kOe and temperature range 2–8 K for 3.

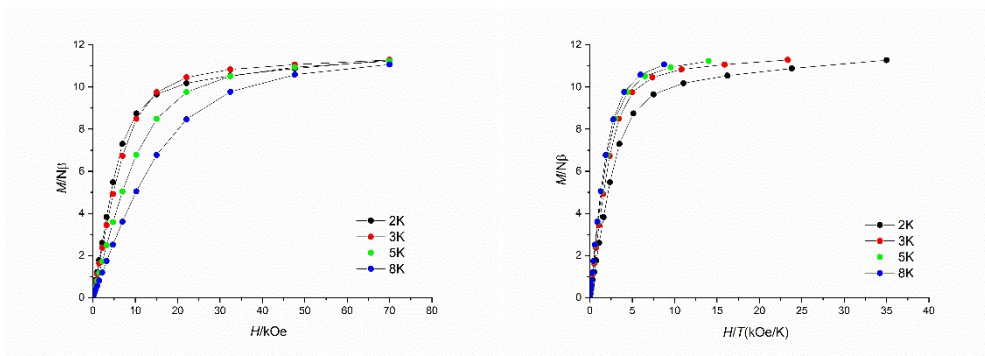

Fig. S8 Field dependences of magnetization in the field range 0–70 kOe and temperature range 2–8 K for 4.

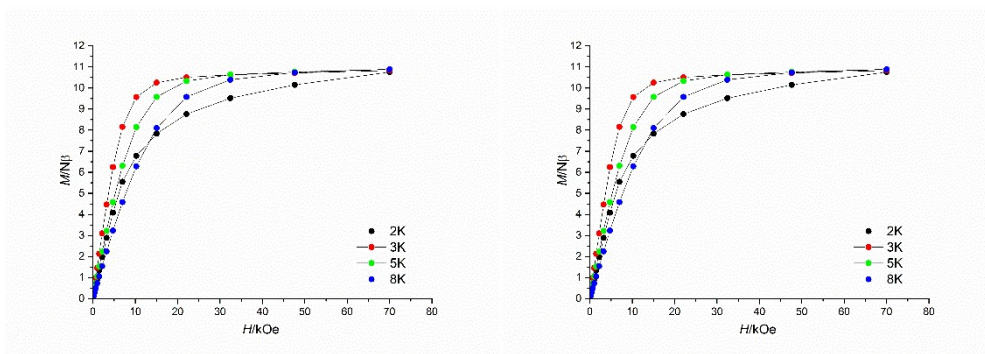

Fig. S9 Field dependences of magnetization in the field range 0–70 kOe and temperature range 2–8 K for 5.

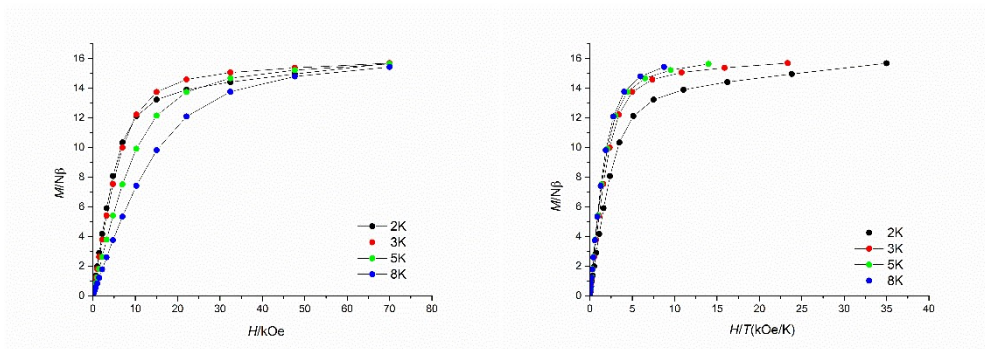

Fig. S10 Field dependences of magnetization in the field range 0–70 kOe and temperature range 2–8 K for 6.

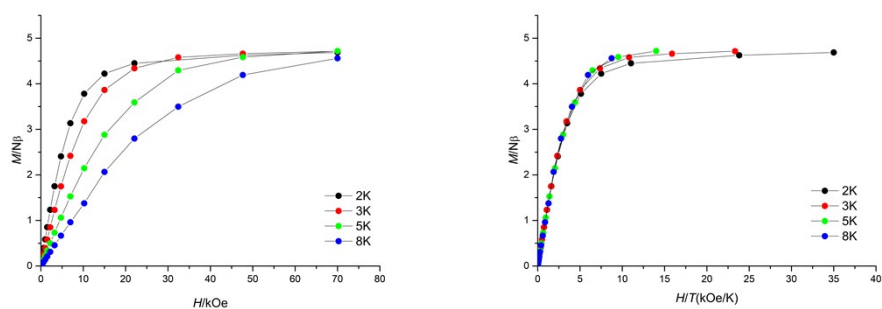

Fig. S11 Field dependences of magnetization in the field range 0–70 kOe and temperature range 2–8 K for **7**.

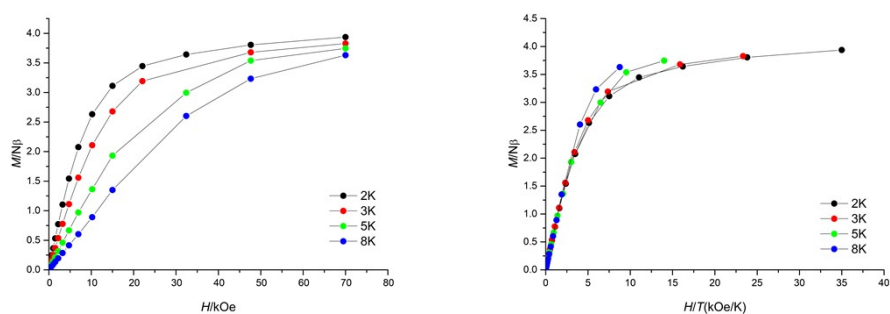

Fig. S12 Field dependences of magnetization in the field range 0–70 kOe and temperature range 2–8 K for **8**.

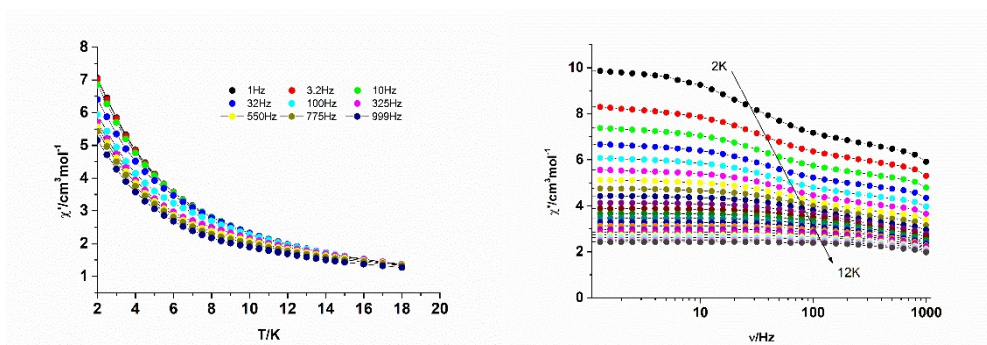

Fig. S13 The temperature and frequency dependence of the in-phase ( $\chi'$ ) ac susceptibility component under zero field for complex **1**.



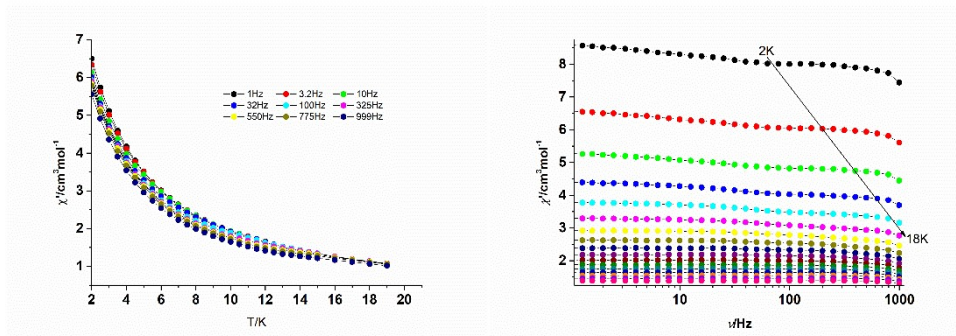

**Fig. S14** The temperature and frequency dependence of the in-phase ( $\chi'$ ) ac susceptibility component under zero field for complex **2**.

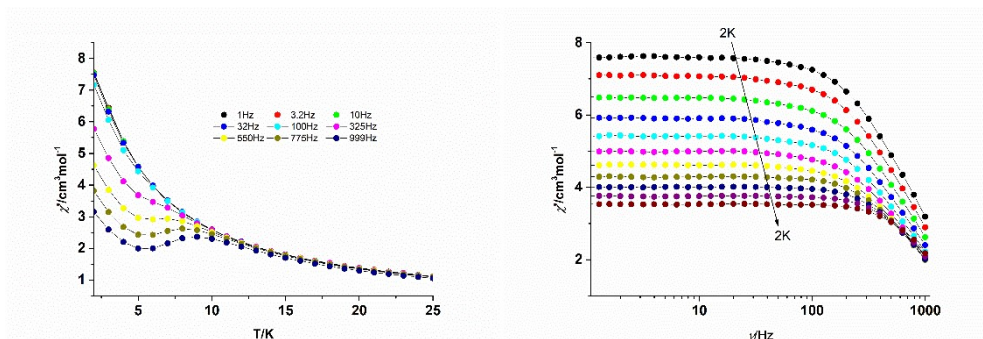

**Fig. S15** The temperature and frequency dependence of the in-phase ( $\chi'$ ) ac susceptibility component under zero field for complex **3**.

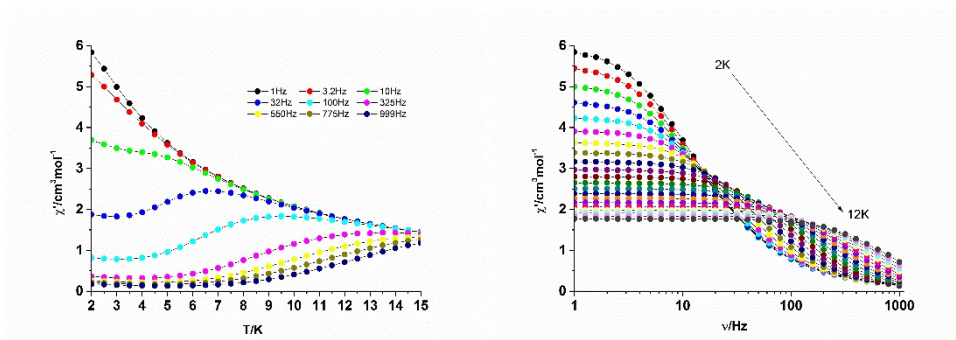

**Fig. S16** The temperature and frequency dependence of the in-phase ( $\chi'$ ) ac susceptibility component under zero field for complex **4**.

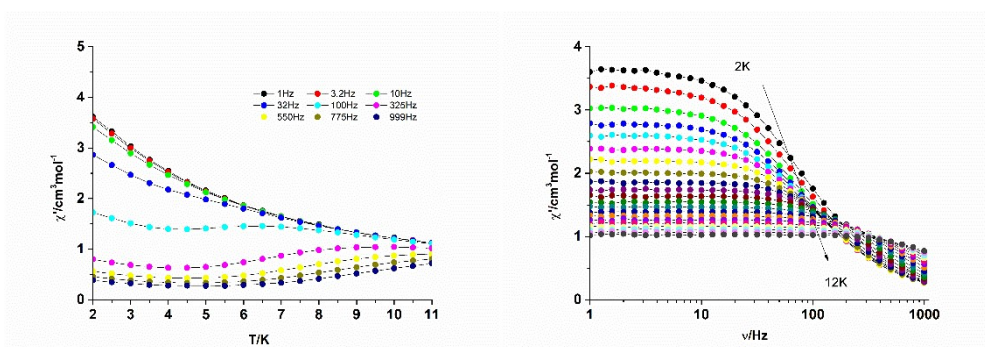

**Fig. S17** The temperature and frequency dependence of the in-phase ( $\chi'$ ) ac susceptibility component under zero field for complex 5.

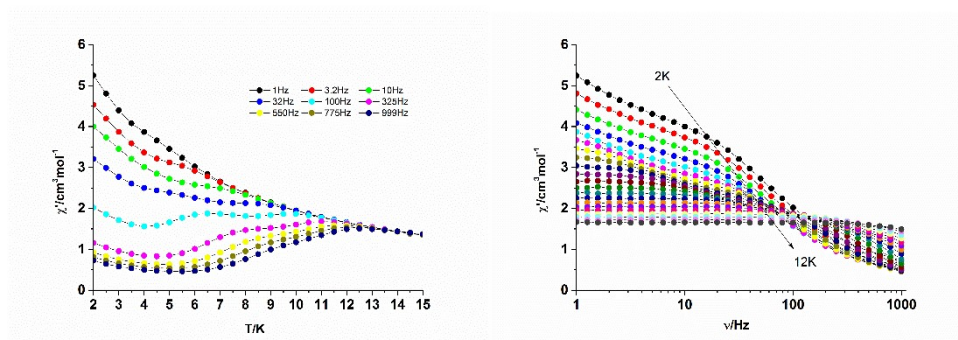

**Fig. S18** The temperature and frequency dependence of the in-phase ( $\chi'$ ) ac susceptibility component under zero field for complex 6.

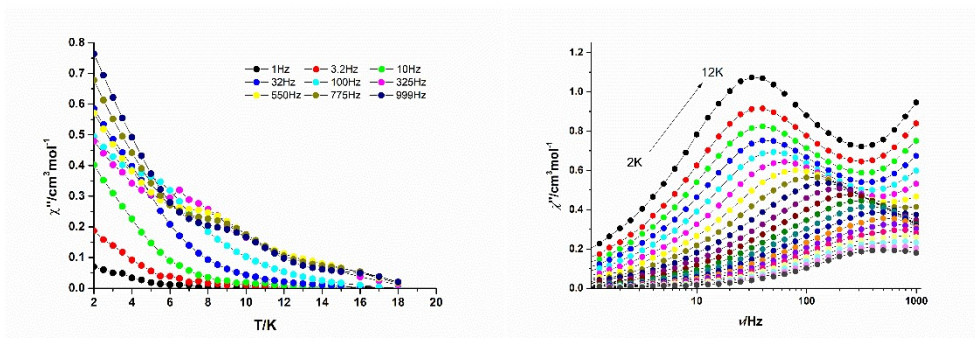

**Fig. S19** The temperature and frequency dependence of the in-phase ( $\chi''$ ) ac susceptibility component under zero field for complex 1.

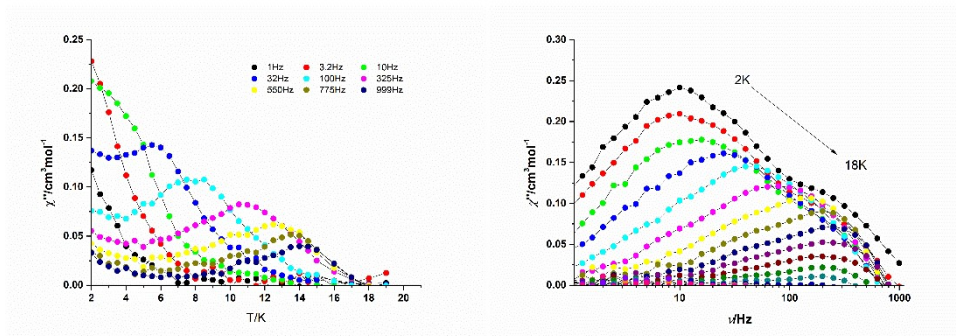

**Fig. S20** The temperature and frequency dependence of the in-phase ( $\chi''$ ) ac susceptibility component under zero field for complex 2.

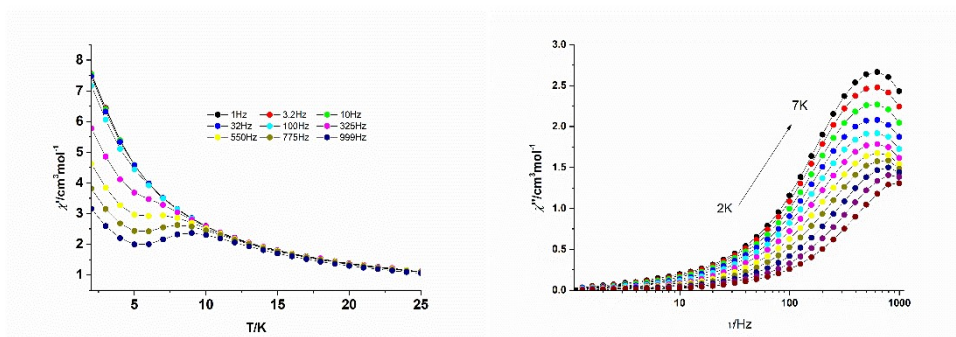

**Fig. S21** The temperature and frequency dependence of the in-phase ( $\chi''$ ) ac susceptibility component under zero field for complex 3.

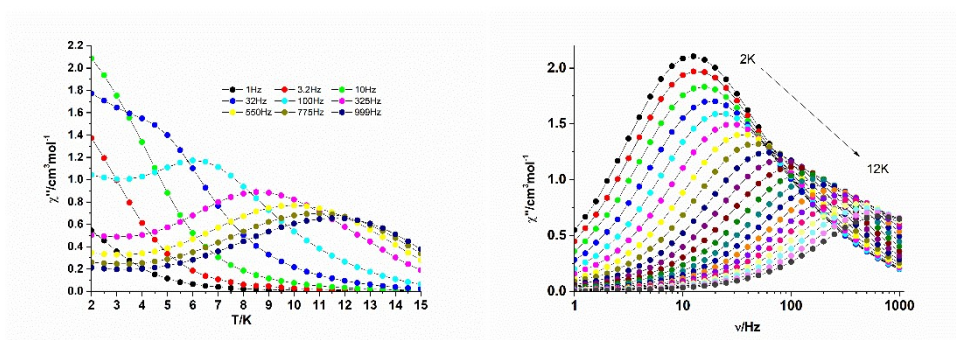

**Fig. S22** The temperature and frequency dependence of the in-phase ( $\chi''$ ) ac susceptibility component under zero field for complex 4.

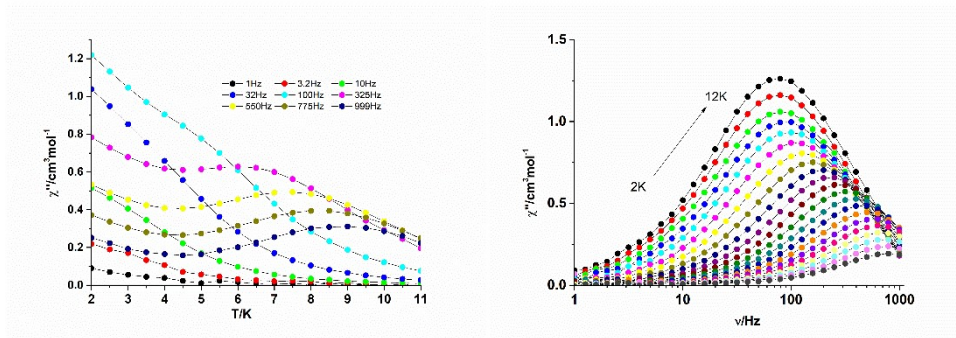

**Fig. S23** The temperature and frequency dependence of the in-phase ( $\chi''$ ) ac susceptibility component under zero field for complex 5.

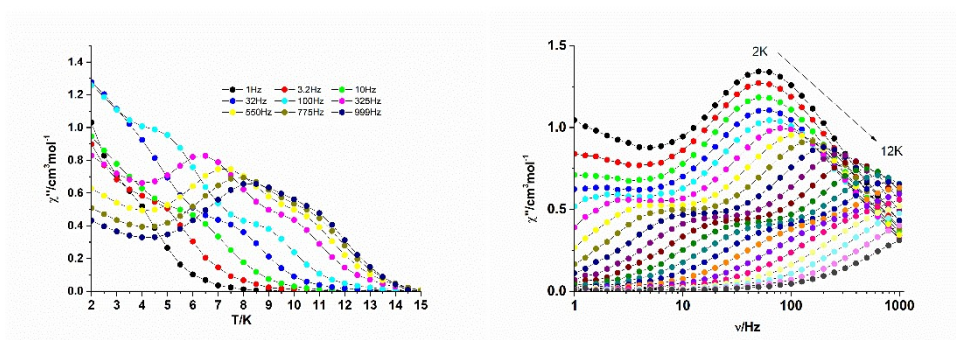

**Fig. S24** The temperature and frequency dependence of the in-phase ( $\chi''$ ) ac susceptibility component under zero field for complex 6.

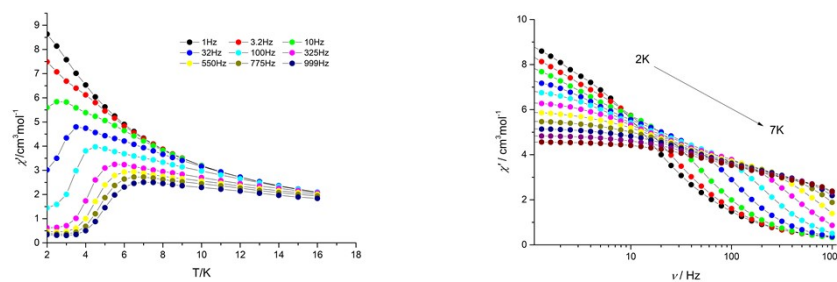

**Fig. S25** The temperature and frequency dependence of the in-phase ( $\chi'$ ) ac susceptibility component under 900 Oe for complex 1.

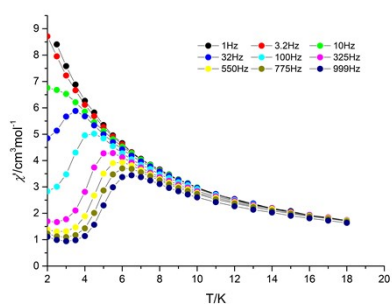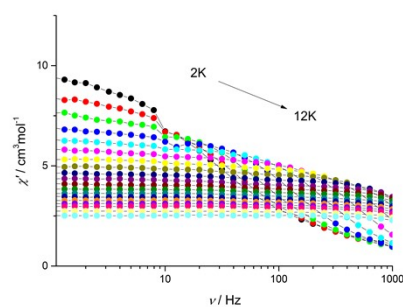

**Fig. S26** The temperature and frequency dependence of the in-phase ( $\chi'$ ) ac susceptibility component under 2100 Oe for complex **2**.

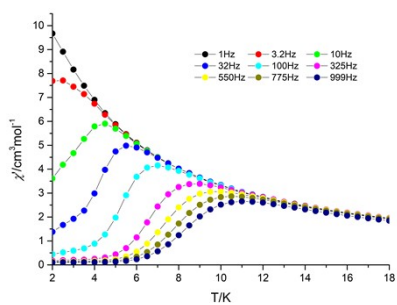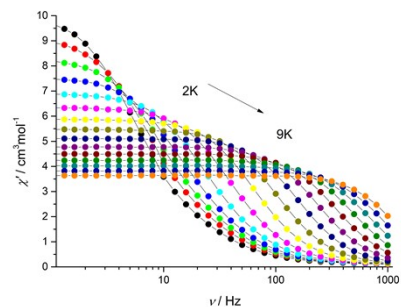

**Fig. S27** The temperature and frequency dependence of the in-phase ( $\chi'$ ) ac susceptibility component under 800 Oe for complex **3**.

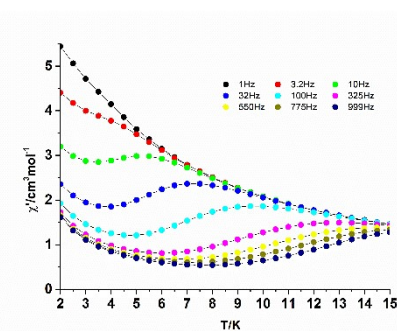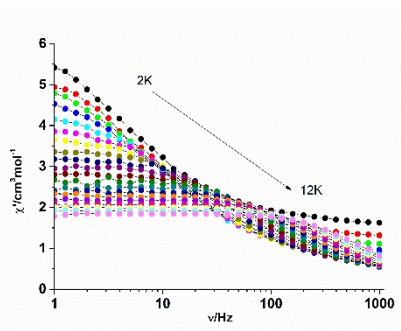

**Fig. S28** The temperature and frequency dependence of the in-phase ( $\chi'$ ) ac susceptibility component under 1500 Oe for complex **4**.

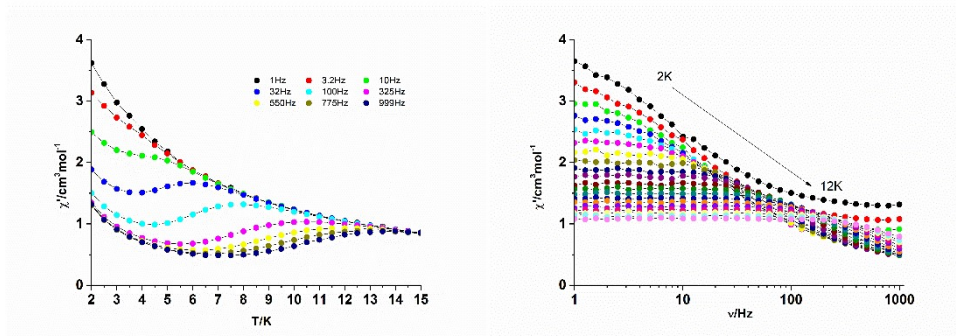

**Fig. S29** The temperature and frequency dependence of the in-phase ( $\chi'$ ) ac susceptibility component under 1500 Oe for complex 5.

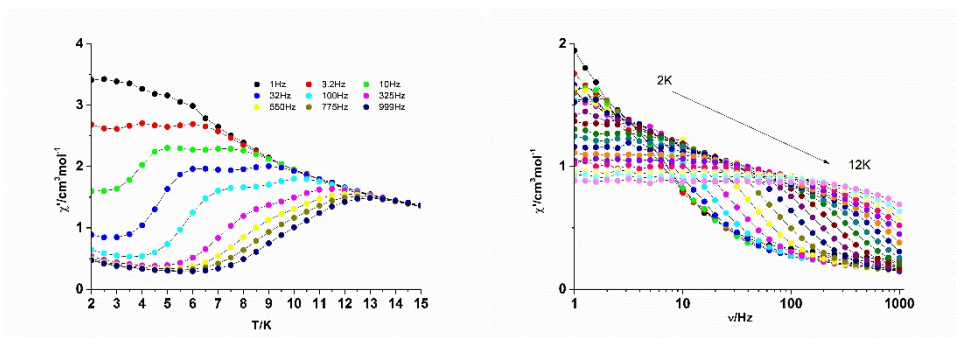

**Fig. S30** The temperature and frequency dependence of the in-phase ( $\chi'$ ) ac susceptibility component under 1500 Oe for complex 6.

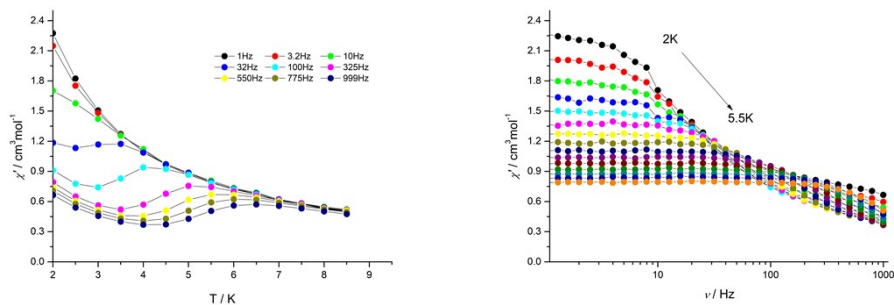

**Fig. S31** The temperature and frequency dependence of the in-phase ( $\chi'$ ) ac susceptibility component under 1100 Oe for complex 7.

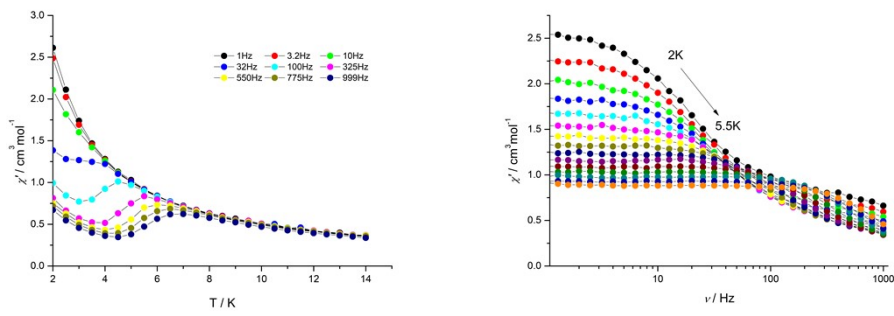

**Fig. S32** The temperature and frequency dependence of the in-phase ( $\chi'$ ) ac susceptibility component under 1100 Oe for complex **8**.

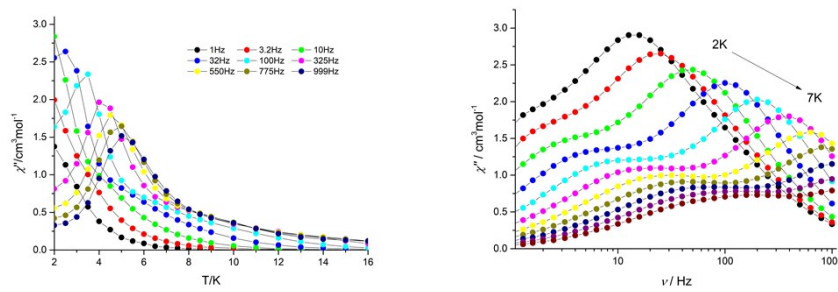

**Fig. S33** The temperature and frequency dependence of the in-phase ( $\chi''$ ) ac susceptibility component under 900 Oe for complex **1**.

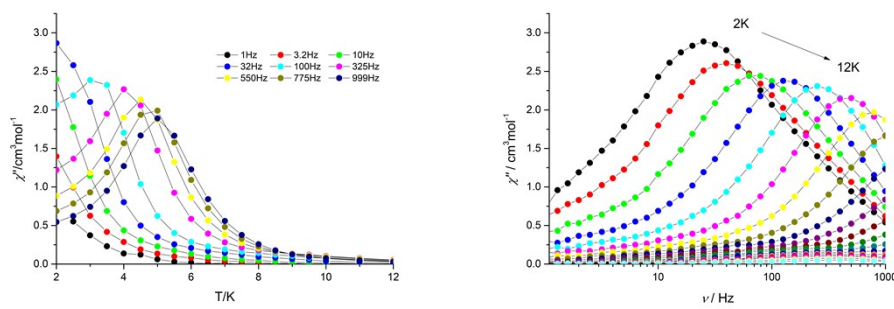

**Fig. S34** The temperature and frequency dependence of the in-phase ( $\chi''$ ) ac susceptibility component under 2100 Oe for complex **2**.

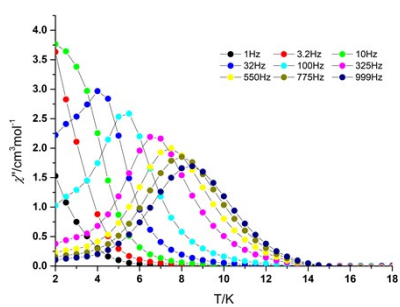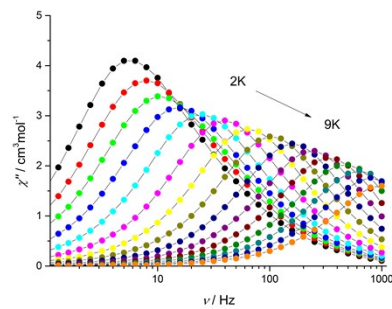

**Fig. S35** The temperature and frequency dependence of the in-phase ( $\chi''$ ) ac susceptibility component under 900 Oe for complex **3**.

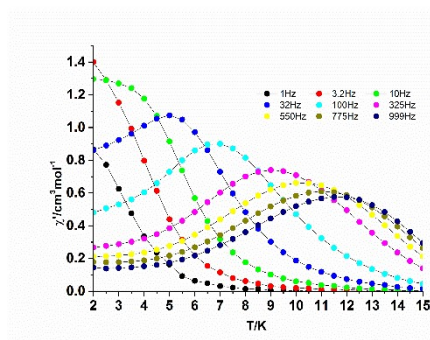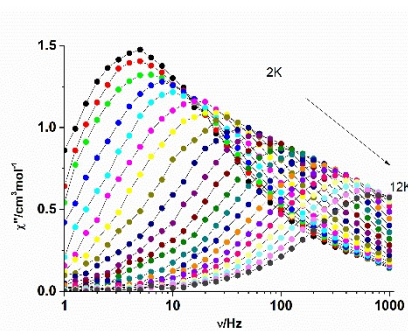

**Fig. S36** The temperature and frequency dependence of the in-phase ( $\chi''$ ) ac susceptibility component under 1500 Oe for complex **4**.

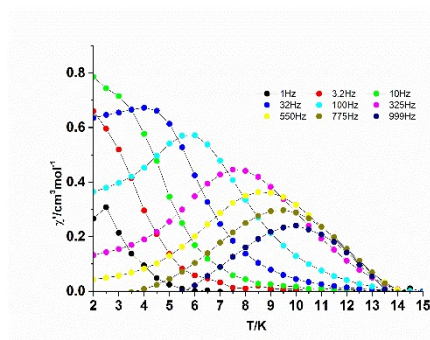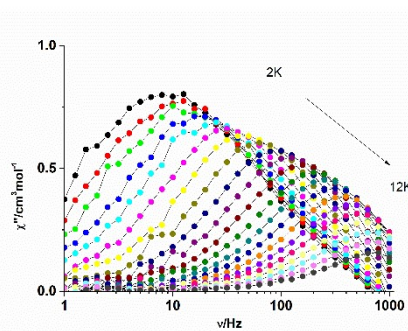

**Fig. S37** The temperature and frequency dependence of the in-phase ( $\chi''$ ) ac susceptibility component under 1500 Oe for complex **5**.



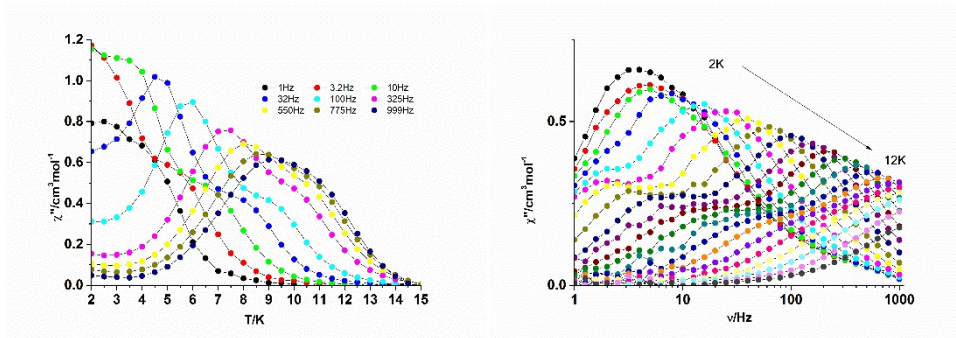

**Fig. S38** The temperature and frequency dependence of the in-phase ( $\chi''$ ) ac susceptibility component under 1500 Oe for complex **6**.

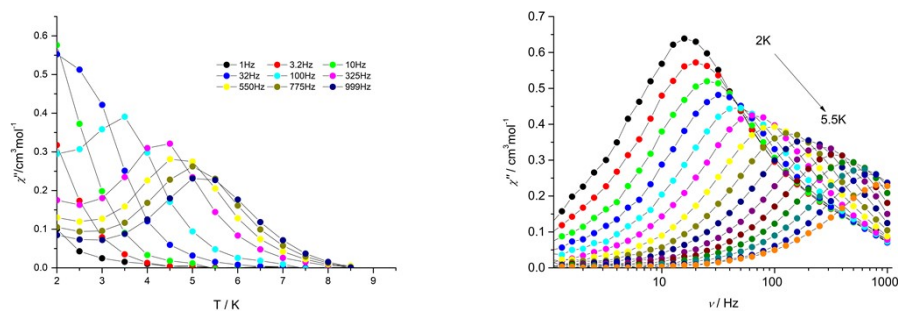

**Fig. S39** The temperature and frequency dependence of the in-phase ( $\chi''$ ) ac susceptibility component under 1100 Oe for complex **7**.

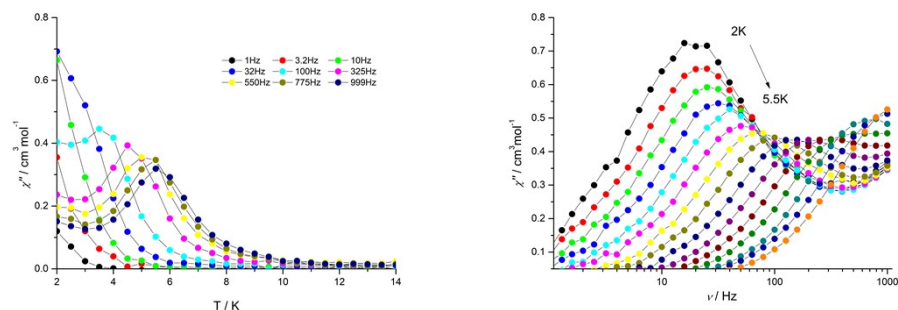

**Fig. S40** The temperature and frequency dependence of the in-phase ( $\chi''$ ) ac susceptibility component under 1100 Oe for complex **8**.

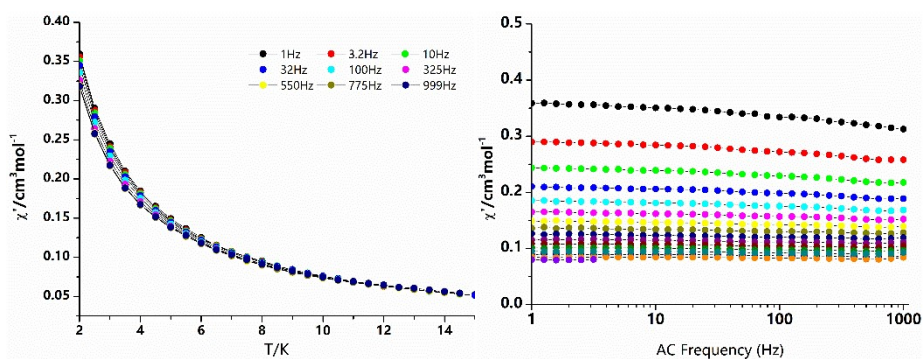

**Fig. S41** The temperature and frequency dependence of the in-phase ( $\chi'$ ) ac susceptibility component under zero field for complex **2a**.

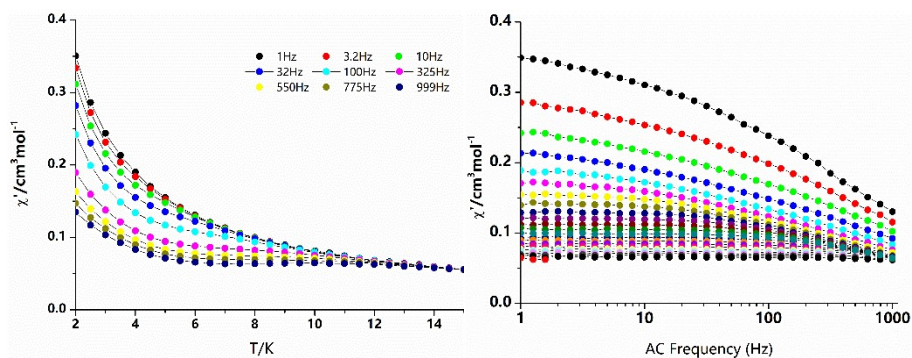

**Fig. S42** The temperature and frequency dependence of the in-phase ( $\chi'$ ) ac susceptibility component under zero field for complex **6a**.

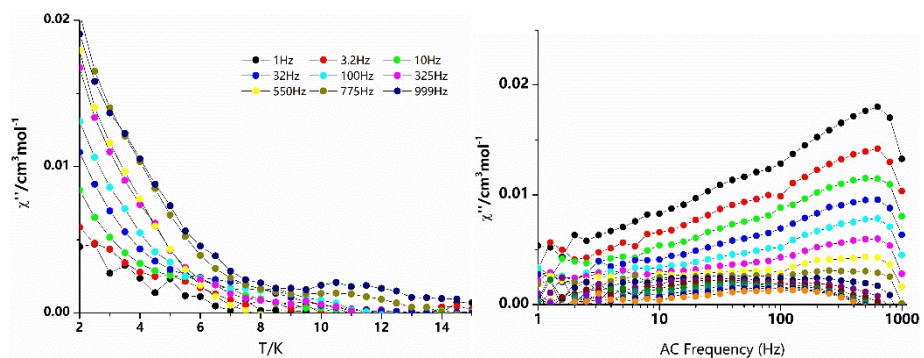

**Fig. S43** The temperature and frequency dependence of the in-phase ( $\chi''$ ) ac susceptibility component under zero field for complex **2a**.

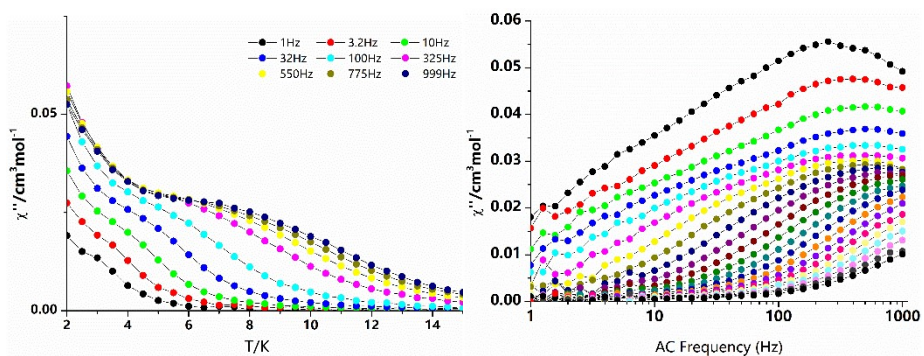

**Fig. S44** The temperature and frequency dependence of the in-phase ( $\chi'$ ) ac susceptibility component under zero field for complex **6a**.

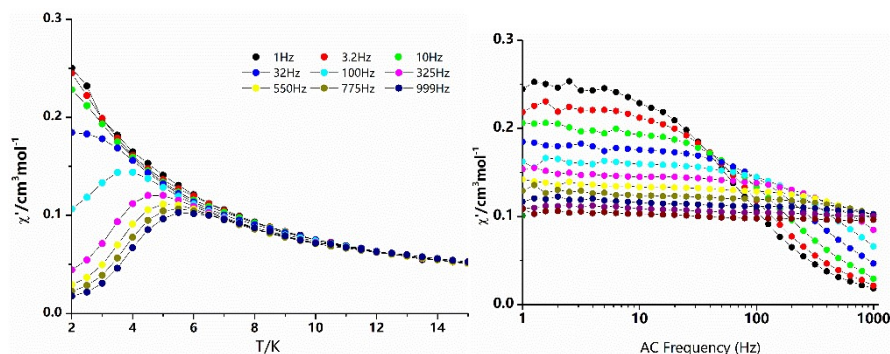

**Fig. S45** The temperature and frequency dependence of the in-phase ( $\chi'$ ) ac susceptibility component under 2100 Oe for complex **2a**.

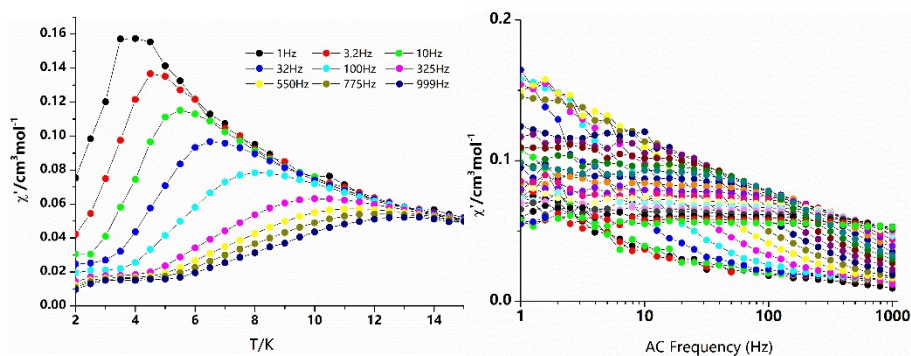

**Fig. S46** The temperature and frequency dependence of the in-phase ( $\chi'$ ) ac susceptibility component under 1500 Oe for complex **6a**.

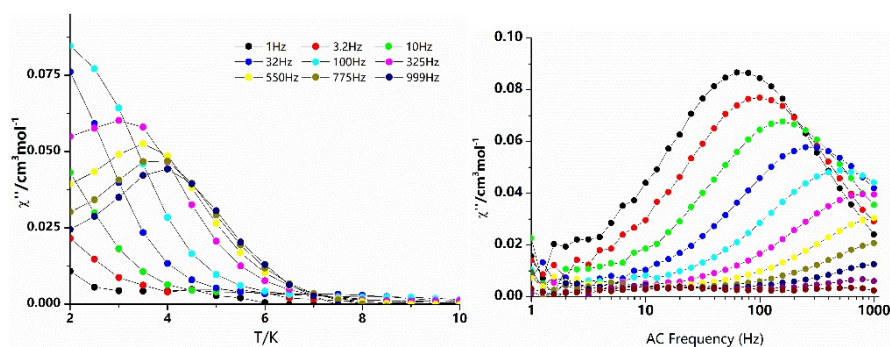

**Fig. S47** The temperature and frequency dependence of the in-phase ( $\chi''$ ) ac susceptibility component under 2100 Oe for complex **2a**.

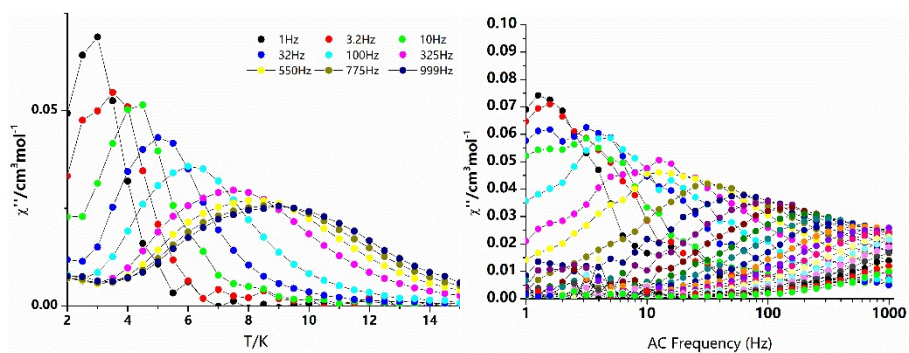

**Fig. S48** The temperature and frequency dependence of the in-phase ( $\chi''$ ) ac susceptibility component under 1500 Oe for complex **6a**.

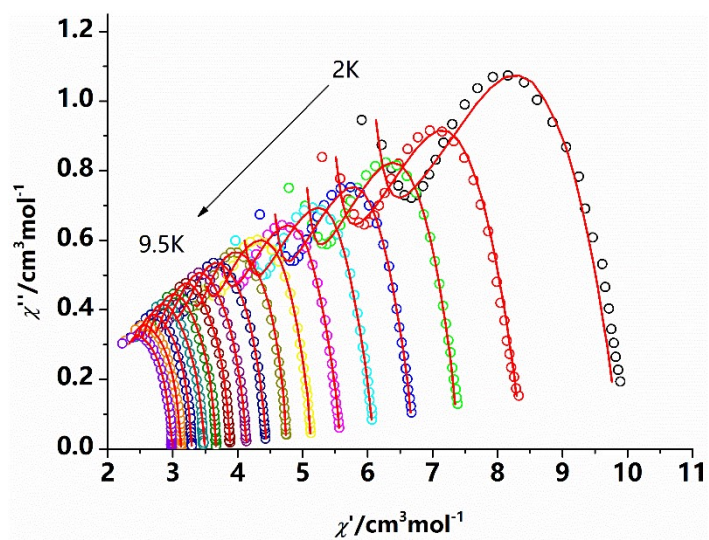

**Fig. S49** Cole-Cole (Argand) plot for **1** obtained using the ac susceptibility data. The solid lines correspond to the best fit obtained with a generalized Debye model under zero dc field.

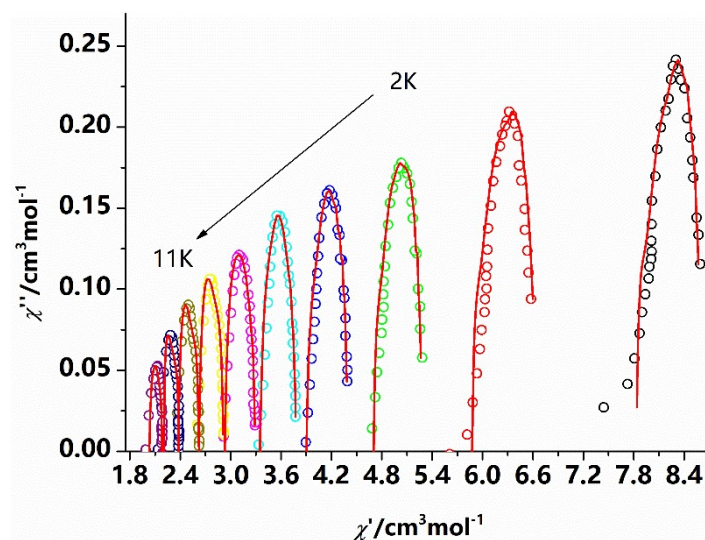

**Fig. S50** Cole-Cole (Argand) plot for **2** obtained using the ac susceptibility data. The solid lines correspond to the best fit obtained with a generalized Debye model under zero dc field.

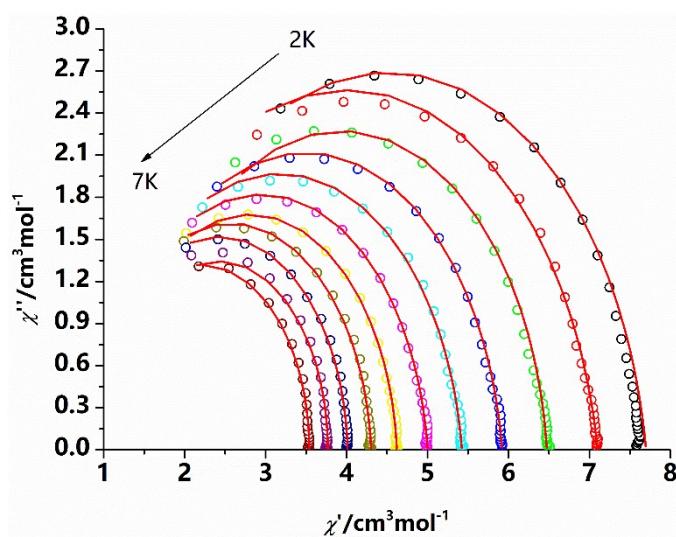

**Fig. S51** Cole-Cole (Argand) plot for **3** obtained using the ac susceptibility data. The solid lines correspond to the best fit obtained with a generalized Debye model under zero dc field.

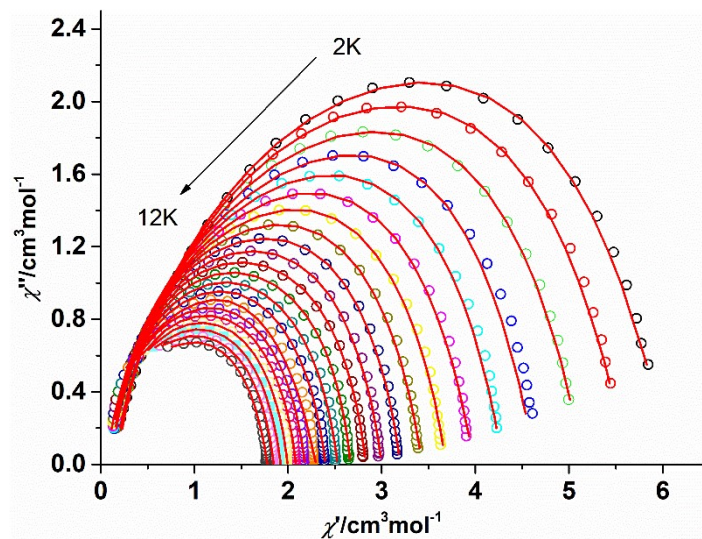

**Fig. S52** Cole-Cole (Argand) plot for **4** obtained using the ac susceptibility data. The solid lines correspond to the best fit obtained with a generalized Debye model under zero dc field.

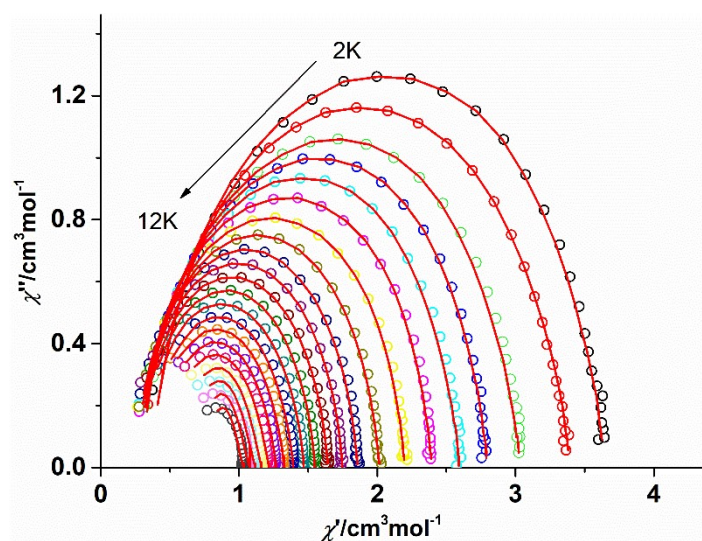

**Fig. S53** Cole-Cole (Argand) plot for **5** obtained using the ac susceptibility data. The solid lines correspond to the best fit obtained with a generalized Debye model under zero dc field.

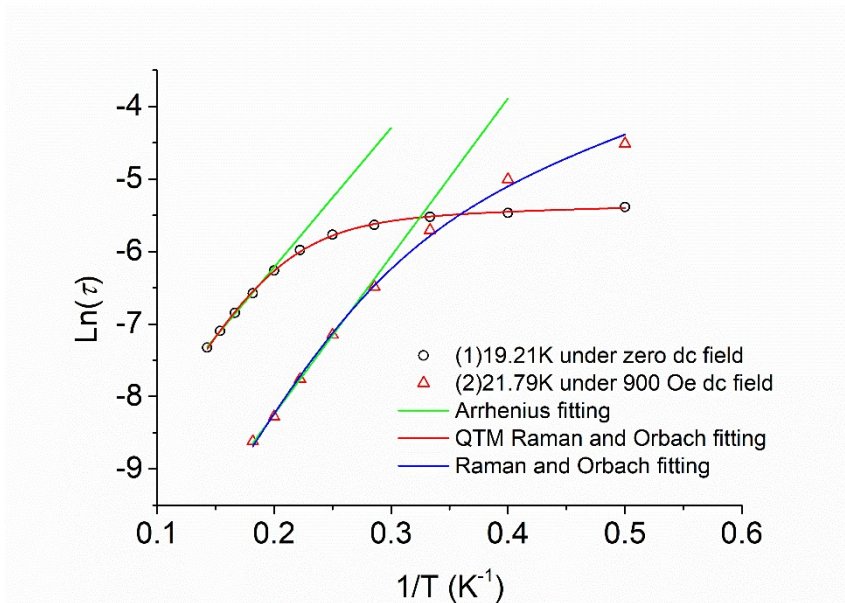

**Fig. S54** Plots of  $\text{Ln}(\tau)$  versus  $1/T$  at zero dc field and out of dc field for **1**. The red solid lines represent the fitting of the frequency data by Equation 1, blue dotted lines by Equation 2, and the green solid lines represent the pure Arrhenius fitting, respectively.

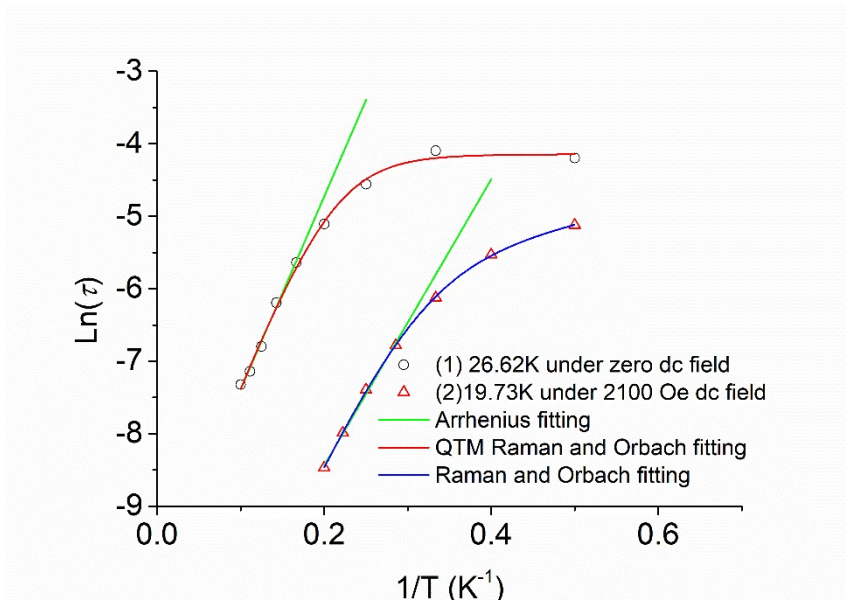

**Fig. S55** Plots of  $\text{Ln}(\tau)$  versus  $1/T$  at zero dc field and out of dc field for **2**. The red solid lines represent the fitting of the frequency data by Equation 1, blue dotted lines by Equation 2, and the green solid lines represent the pure Arrhenius fitting, respectively.

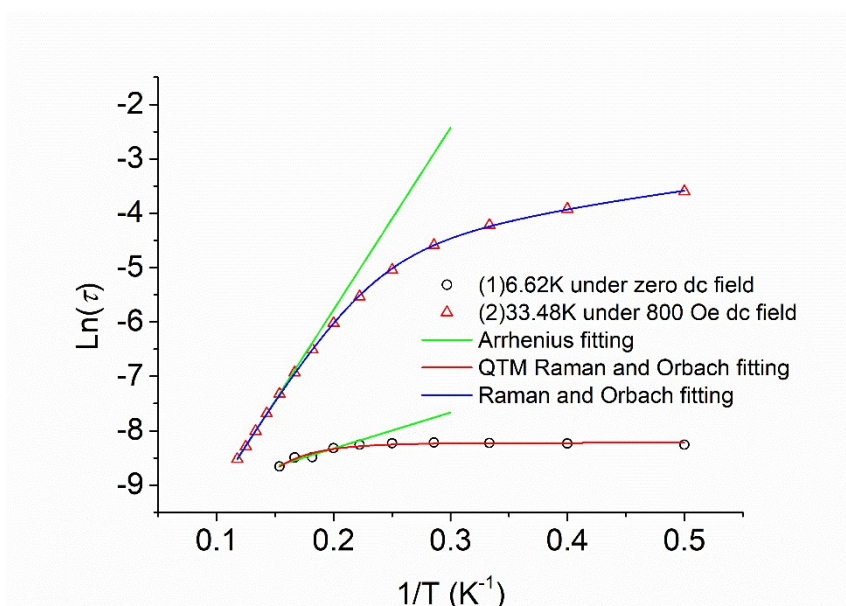

**Fig. S56** Plots of  $\ln(\tau)$  versus  $1/T$  at zero dc field and out of dc field for **3**. The red solid lines represent the fitting of the frequency data by Equation 1, blue dotted lines by Equation 2, and the green solid lines represent the pure Arrhenius fitting, respectively.

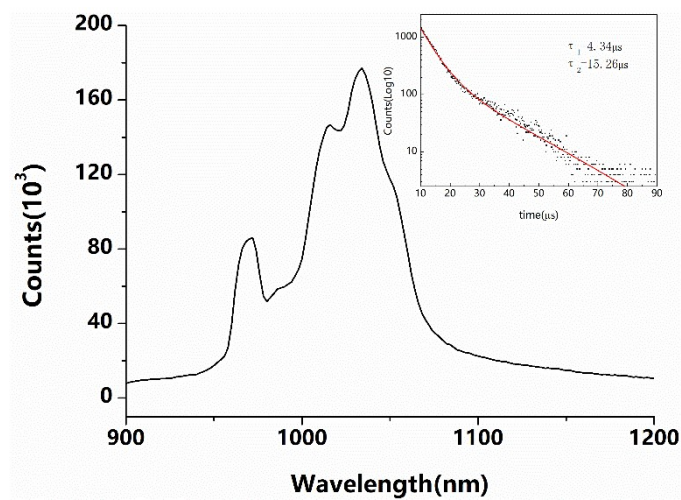

**Fig. S57** Emission spectrum at  $\lambda_{exc} = 310$  nm at 77 K and Luminescence decay profiles of complex **7**.



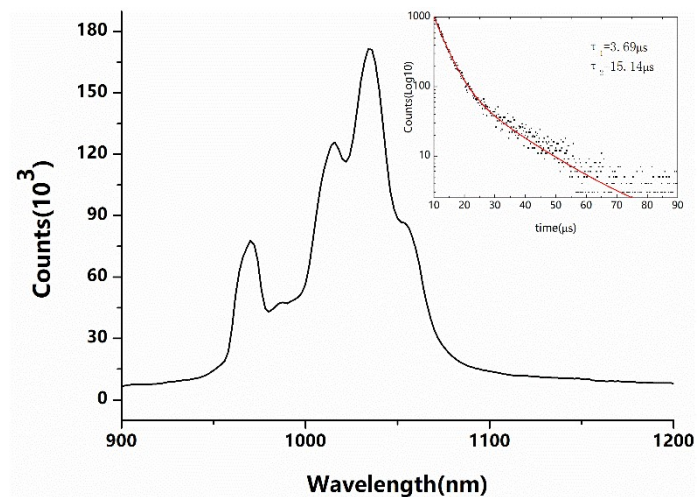

**Fig. S58** Emission spectrum at  $\lambda_{\text{exc}} = 310 \text{ nm}$  at 77 K and Luminescence decay profiles of complex **8**.

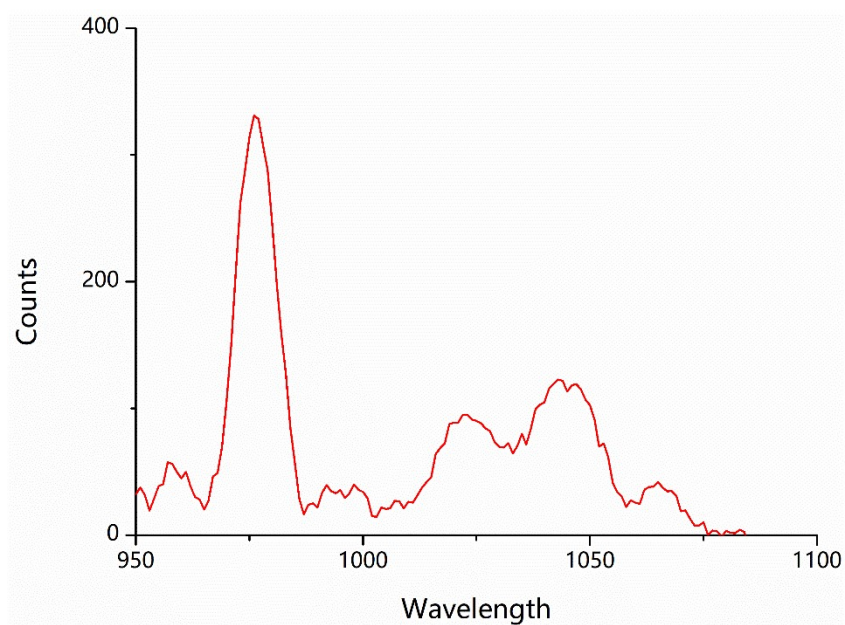

**Fig. S59** Emission spectrum at  $\lambda_{\text{exc}} = 310 \text{ nm}$  at 75 K and Luminescence decay profiles of complex **8**.

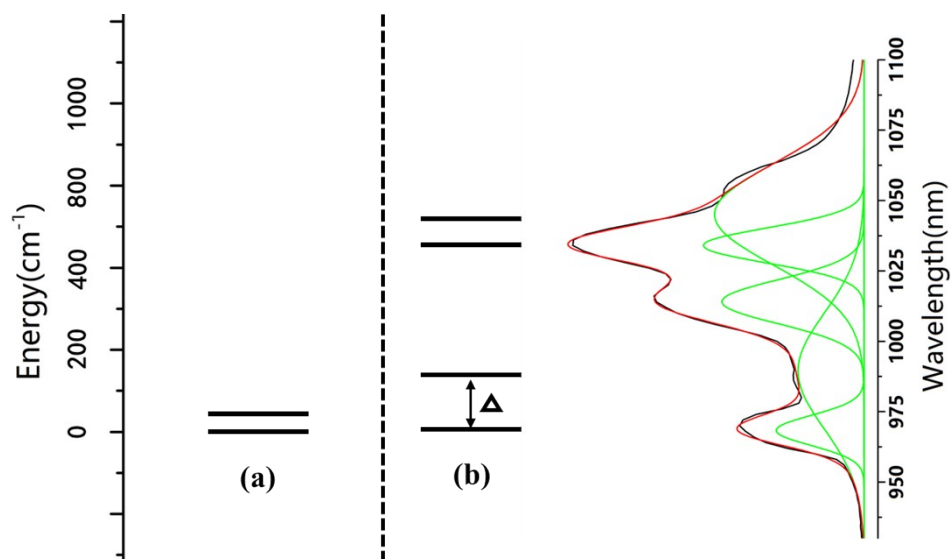

**Fig. S60** Energy levels of the  ${}^2F_{7/2}$  ground state multiple determined from (a) ac fit ( $U_{\text{eff}}/k_B=18.6\text{ cm}^{-1}$ ), and (b) the luminescence spectrum of complex **7** ( $\Delta=178\text{ cm}^{-1}$ ). The area of Gaussian deconvolution corresponding to the four Kramers doublets and one hot transition.

### Computational details

Both of binuclear complexes **2** and **4** have one type of molecular structure. For binuclear complex **6**, it has two types of molecular structures indicated as **6\_a** and **6\_b**. Each of them has one type of magnetic center Dy<sup>III</sup> ion due to their centrosymmetric structures. Complete-active-space self-consistent field (CASSCF) calculations on individual Dy<sup>III</sup> fragments for complexes **2**, **4** and **6** (see Fig. S61 for the calculated complete structures of **2**, **4** and **6**) on the basis of single-crystal X-ray determined geometries have been carried out with MOLCAS 8.4<sup>51</sup> program package. Each individual Dy<sup>III</sup> fragment in **2**, **4** and **6** was calculated keeping the experimentally determined structure of the corresponding compound while replacing the neighboring Dy<sup>III</sup> ion by diamagnetic Lu<sup>III</sup>.

The basis sets for all atoms are atomic natural orbitals from the MOLCAS ANO-RCC library: ANO-RCC-VTZP for Dy<sup>III</sup>; VTZ for close O; VDZ for distant atoms. The calculations employed the second order Douglas-Kroll-Hess Hamiltonian, where scalar relativistic contractions were taken into account in the basis set and the spin-orbit couplings were handled separately in the restricted active space state interaction (RASSI-SO) procedure. Active electrons in 7 active orbitals include all *f* electrons (CAS (9 in 7) in the CASSCF calculation. To exclude all the doubts, we calculated all the roots in the active space. We have mixed the maximum number of spin-free state which was possible with our hardware (all from 21 sextets, 128 from 224 quadruplets, 130 from 490 doublets for Dy<sup>III</sup>). SINGLE\_ANISO<sup>52-54</sup> program was used to obtain the energy levels, *g* tensors, magnetic axes, *et al.* based on the above CASSCF/RASSI-SO calculations.

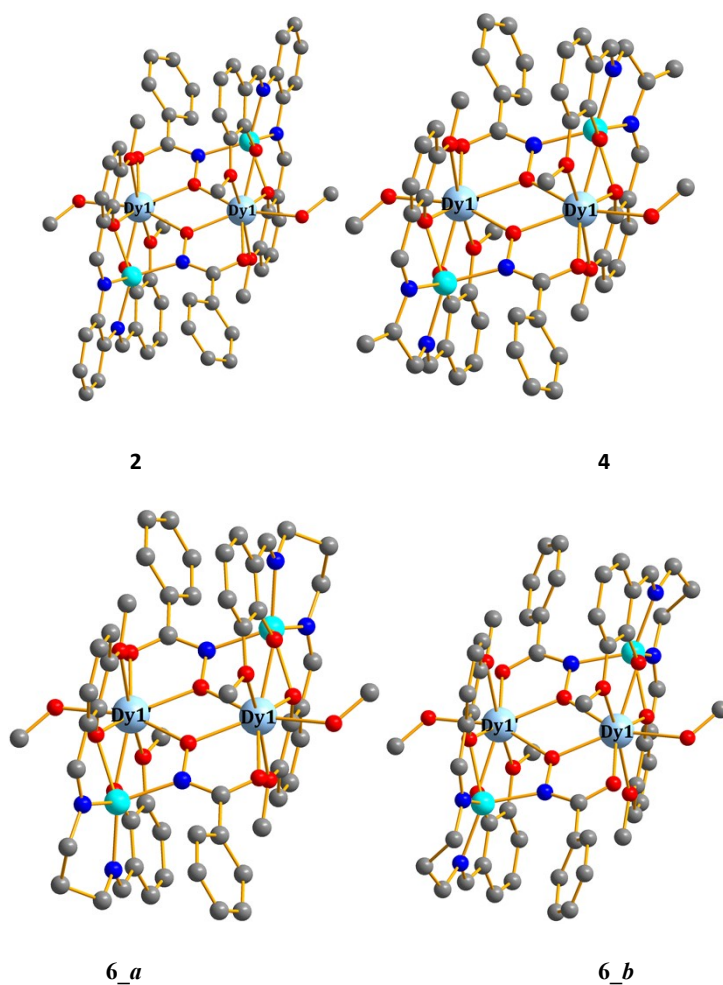

Fig. S61 Calculated complete structures of complexes **2**, **4** and **6**; H atoms are omitted for clarity.

**Table S22.** Calculated energy levels ( $\text{cm}^{-1}$ ),  $g$  ( $g_x, g_y, g_z$ ) tensors and predominant  $m_J$  values of the lowest eight Kramers doublets (KDs) of individual  $\text{Dy}^{\text{III}}$  fragments for complexes **2**, **4** and **6** using CASSCF/RASSI-SO with MOLCAS 8.4.

| KDs | 1(Dy1)             |                          |            | 2(Dy1)             |                          |            | 3_a(Dy1)           |                          |            | 3_b(Dy1)           |                          |            |
|-----|--------------------|--------------------------|------------|--------------------|--------------------------|------------|--------------------|--------------------------|------------|--------------------|--------------------------|------------|
|     | $E/\text{cm}^{-1}$ | $g$                      | $m_J$      |
| 1   | 0.0                | 0.014<br>0.024<br>19.778 | $\pm 15/2$ | 0.0                | 0.022<br>0.039<br>19.742 | $\pm 15/2$ | 0.0                | 0.026<br>0.047<br>19.701 | $\pm 15/2$ | 0.0                | 0.025<br>0.046<br>19.681 | $\pm 15/2$ |
| 2   | 262.7              | 0.941<br>2.295<br>15.513 | $\pm 13/2$ | 219.5              | 1.050<br>2.463<br>15.915 | $\pm 13/2$ | 218.6              | 1.543<br>4.775<br>13.793 | $\pm 13/2$ | 19<br>7.8          | 0.788<br>1.545<br>16.629 | $\pm 13/2$ |
| 3   | 363.1              | 2.365<br>3.486<br>10.241 | $\pm 11/2$ | 311.4              | 1.715<br>3.553<br>10.815 | $\pm 11/2$ | 292.0              | 0.224<br>4.151<br>8.847  | $\pm 11/2$ | 30<br>8.3          | 3.101<br>3.513<br>11.401 | $\pm 7/2$  |
| 4   | 494.7              | 7.485<br>6.722<br>1.608  | $\pm 5/2$  | 439.6              | 7.739<br>6.725<br>1.772  | $\pm 5/2$  | 422.9              | 7.493<br>6.921<br>1.976  | $\pm 5/2$  | 42<br>2.9          | 7.296<br>6.724<br>1.472  | $\pm 5/2$  |
| 5   | 634.3              | 2.481<br>3.837<br>10.291 | $\pm 3/2$  | 570.0              | 2.658<br>3.810<br>10.358 | $\pm 3/2$  | 553.6              | 2.703<br>3.483<br>10.629 | $\pm 3/2$  | 54<br>9.5          | 2.715<br>3.144<br>10.839 | $\pm 3/2$  |
| 6   | 744.4              | 1.048<br>1.332<br>14.095 | $\pm 1/2$  | 674.8              | 0.970<br>1.241<br>14.286 | $\pm 1/2$  | 663.4              | 0.802<br>0.885<br>14.427 | $\pm 1/2$  | 66<br>2.7          | 0.567<br>0.748<br>14.535 | $\pm 1/2$  |
| 7   | 874.9              | 0.133<br>0.220<br>17.131 | $\pm 5/2$  | 812.3              | 0.125<br>0.209<br>17.147 | $\pm 5/2$  | 800.4              | 0.118<br>0.195<br>17.178 | $\pm 5/2$  | 80<br>5.0          | 0.121<br>0.199<br>17.156 | $\pm 5/2$  |
| 8   | 1028.5             | 0.018<br>0.031<br>19.644 | $\pm 1/2$  | 967.9              | 0.023<br>0.041<br>19.603 | $\pm 1/2$  | 950.0              | 0.020<br>0.034<br>19.598 | $\pm 1/2$  | 95<br>4.5          | 0.027<br>0.049<br>19.587 | $\pm 1/2$  |

**Table S23.** Wave functions with definite projection of the total moment  $|m_j\rangle$  for the lowest eight KDs of individual DyIII fragments for complexes **2**, **4** and **6**.

|                 | $E/\text{cm}^{-1}$ | wave functions                                                                         |
|-----------------|--------------------|----------------------------------------------------------------------------------------|
| <b>2(Dy1)</b>   | 0.0                | 98.6% $\pm$ 15/2>                                                                      |
|                 | 290.6              | 65.4% $\pm$ 13/2>+19.2% $\pm$ 9/2>+5.7% $\pm$ 5/2>                                     |
|                 | 532.2              | 39.4% $\pm$ 11/2>+29.9% $\pm$ 7/2>+15.1% $\pm$ 13/2>+8.5% $\pm$ 3/2>                   |
|                 | 656.1              | 31.0% $\pm$ 5/2>+23.5% $\pm$ 9/2>+18.7% $\pm$ 11/2>+15.0% $\pm$ 13/2>+8.1% $\pm$ 1/2>  |
|                 | 708.3              | 36.2% $\pm$ 3/2>+23.8% $\pm$ 11/2>+16.9% $\pm$ 9/2>+9.5% $\pm$ 1/2>+9.4% $\pm$ 7/2>    |
|                 | 760.0              | 41.3% $\pm$ 1/2>+20.8% $\pm$ 9/2>+19.7% $\pm$ 7/2>+8.3% $\pm$ 5/2>                     |
|                 | 803.1              | 30.3% $\pm$ 5/2>+25.1% $\pm$ 7/2>+21.5% $\pm$ 3/2>+13.1% $\pm$ 9/2>                    |
|                 | 903.9              | 31.1% $\pm$ 1/2>+27.0% $\pm$ 3/2>+20.2% $\pm$ 5/2>+12.7% $\pm$ 7/2>                    |
| <b>4(Dy1)</b>   | 0.0                | 98.0% $\pm$ 15/2>                                                                      |
|                 | 287.9              | 49.5% $\pm$ 13/2>+23.1% $\pm$ 9/2>+8.6% $\pm$ 5/2>+6.4% $\pm$ 11/2>+5.1% $\pm$ 7/2>    |
|                 | 524.7              | 31.7% $\pm$ 11/2>+29.0% $\pm$ 7/2>+25.6% $\pm$ 13/2>+8.0% $\pm$ 3/2>                   |
|                 | 640.3              | 31.2% $\pm$ 5/2>+19.7% $\pm$ 11/2>+18.7% $\pm$ 13/2>+17.8% $\pm$ 9/2>+8.5% $\pm$ 1/2>  |
|                 | 691.8              | 37.6% $\pm$ 3/2>+24.1% $\pm$ 11/2>+16.2% $\pm$ 9/2>+9.9% $\pm$ 1/2>+6.5% $\pm$ 7/2>    |
|                 | 755.5              | 41.9% $\pm$ 1/2>+20.4% $\pm$ 9/2>+18.5% $\pm$ 7/2>+7.5% $\pm$ 11/2>+6.9% $\pm$ 5/2>    |
|                 | 799.5              | 28.8% $\pm$ 5/2>+25.3% $\pm$ 7/2>+19.6% $\pm$ 3/2>+14.7% $\pm$ 9/2>+6.2% $\pm$ 11/2>   |
|                 | 879.5              | 29.4% $\pm$ 1/2>+26.2% $\pm$ 3/2>+20.3% $\pm$ 5/2>+13.5% $\pm$ 7/2>                    |
| <b>6_a(Dy1)</b> | 0.0                | 97.4% $\pm$ 15/2>                                                                      |
|                 | 284.7              | 52.9% $\pm$ 13/2>+24.8% $\pm$ 9/2>+9.6% $\pm$ 5/2>+3.9% $\pm$ 1/2>                     |
|                 | 513.2              | 32.9% $\pm$ 11/2>+31.2% $\pm$ 7/2>+18.2% $\pm$ 13/2>+10.0% $\pm$ 3/2>                  |
|                 | 627.0              | 29.6% $\pm$ 5/2>+21.4% $\pm$ 13/2>+20.5% $\pm$ 11/2>+14.3% $\pm$ 9/2>+9.3% $\pm$ 1/2>  |
|                 | 670.4              | 35.3% $\pm$ 3/2>+24.3% $\pm$ 11/2>+17.9% $\pm$ 9/2>+9.6% $\pm$ 1/2>+5.3% $\pm$ 7/2>    |
|                 | 723.6              | 39.3% $\pm$ 1/2>+20.7% $\pm$ 9/2>+19.4% $\pm$ 7/2>+8.7% $\pm$ 11/2>+6.3% $\pm$ 5/2>    |
|                 | 775.7              | 28.8% $\pm$ 5/2>+24.9% $\pm$ 7/2>+19.4% $\pm$ 3/2>+14.8% $\pm$ 9/2>+6.4% $\pm$ 11/2>   |
|                 | 922.5              | 29.6% $\pm$ 1/2>+26.2% $\pm$ 3/2>+20.0% $\pm$ 5/2>+13.3% $\pm$ 7/2>+7.1% $\pm$ 9/2>    |
| <b>6_b(Dy1)</b> | 0.0                | 97.3% $\pm$ 15/2>                                                                      |
|                 | 299.3              | 46.8% $\pm$ 13/2>+23.1% $\pm$ 9/2>+9.3% $\pm$ 11/2>+8.1% $\pm$ 5/2>+5.8% $\pm$ 7/2>    |
|                 | 550.6              | 29.3% $\pm$ 7/2>+28.8% $\pm$ 11/2>+25.6% $\pm$ 13/2>+9.5% $\pm$ 3/2>                   |
|                 | 679.5              | 32.2% $\pm$ 5/2>+20.6% $\pm$ 13/2>+16.3% $\pm$ 9/2>+14.9% $\pm$ 11/2>+11.6% $\pm$ 1/2> |
|                 | 724.7              | 35.7% $\pm$ 3/2>+26.4% $\pm$ 11/2>+15.2% $\pm$ 9/2>+10.7% $\pm$ 1/2>+5.1% $\pm$ 7/2>   |
|                 | 778.6              | 37.5% $\pm$ 1/2>+22.5% $\pm$ 9/2>+18.6% $\pm$ 7/2>+9.5% $\pm$ 11/2>+6.3% $\pm$ 5/2>    |
|                 | 839.3              | 28.5% $\pm$ 5/2>+26.0% $\pm$ 7/2>+18.9% $\pm$ 3/2>+15.3% $\pm$ 9/2>+6.4% $\pm$ 11/2>   |
|                 | 895.1              | 30.5% $\pm$ 1/2>+26.4% $\pm$ 3/2>+20.1% $\pm$ 5/2>+12.9% $\pm$ 7/2>                    |

**Table S24.** Fitted exchange couplings  $\mathcal{J}_{\text{exch}}$ , the calculated dipole-dipole interactions  $\mathcal{J}_{\text{dip}}$  and the total constants  $\mathcal{J}_{\text{total}}$  between magnetic center ions in **2**, **4** and **6** ( $\text{cm}^{-1}$ ) The intermolecular interactions  $zJ'$  of **2**, **4** and **6** were

fitted to  $-0.04$ ,  $-0.07$ ,  $-0.03$  and  $-0.03 \text{ cm}^{-1}$ ,

respectively.

|                                   | <b>2</b> | <b>4</b> | <b>6_a</b> | <b>6_b</b> |
|-----------------------------------|----------|----------|------------|------------|
| $\mathcal{J}_{\text{dip}}^{\%}$   | 5.66     | 5.70     | 5.76       | 5.63       |
| $\mathcal{J}_{\text{exch}}^{\%}$  | -6.00    | -7.50    | -7.50      | -7.50      |
| $\mathcal{J}_{\text{total}}^{\%}$ | -0.34    | -1.80    | -1.74      | -1.87      |

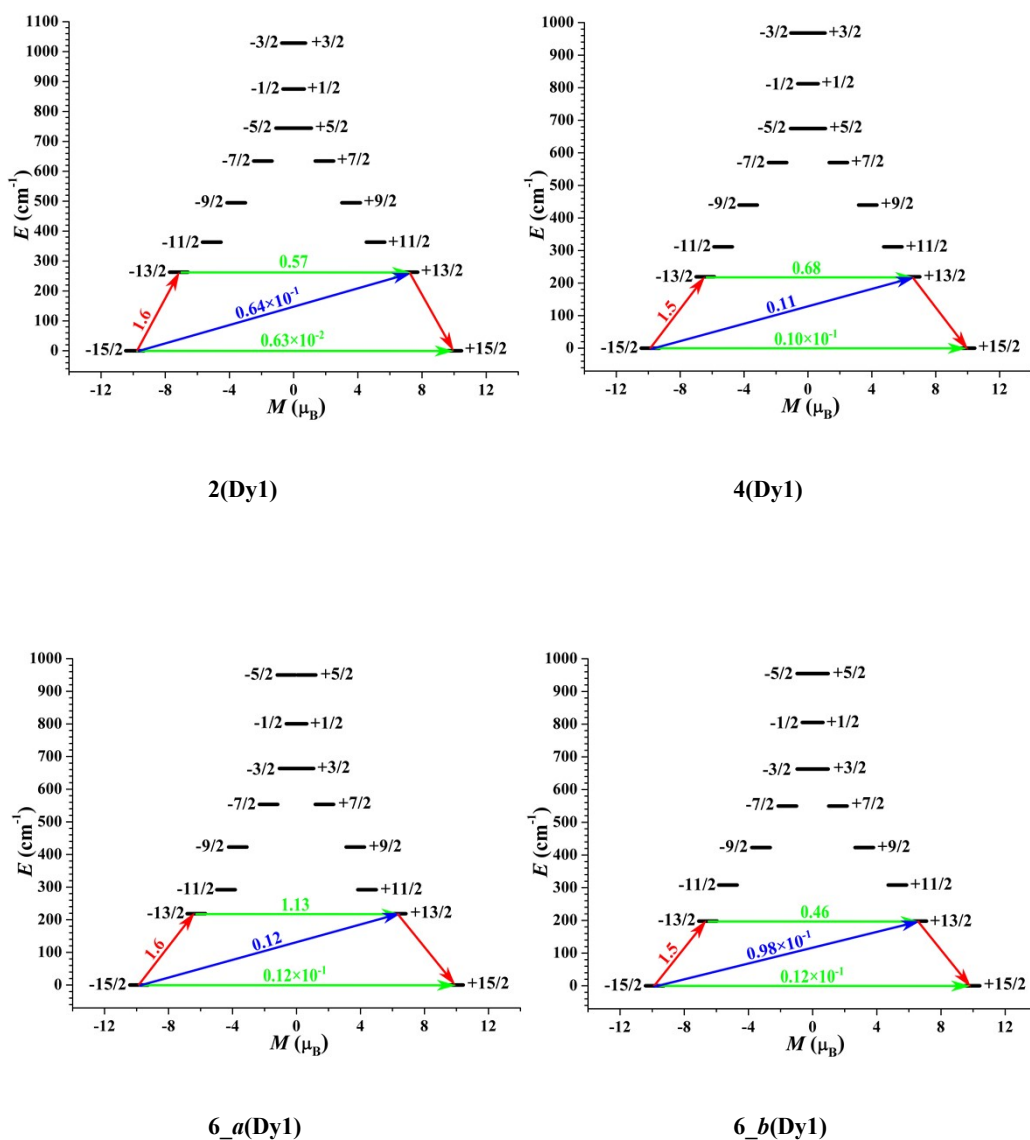

**Fig. S62** Magnetization blocking barriers of individual Dy<sup>III</sup> fragments for **2**, **4** and **6**. The thick black lines represent the KDs as a function of their magnetic moment along the magnetic axis. The green lines correspond to diagonal quantum tunneling of magnetization (QTM); the blue line represent off-diagonal relaxation process. The numbers at each arrow stand for the mean absolute value of the corresponding matrix element of transition magnetic moment.

To fit the exchange interactions in complexes **2**, **4** and **6**, we took two steps to obtain it. Firstly, we calculated individual Dy<sup>III</sup> fragments using CASSCF/RASSI-SO to obtain the corresponding magnetic properties. Then, the exchange interaction between the magnetic centers was considered within the Lines model,<sup>55</sup> while the account of the dipole-dipole magnetic coupling was treated exactly. The Lines model is effective and has been successfully used widely in the research field of *d* and *f*-elements single-molecule magnets.<sup>56–57</sup>

For complexes **2**, **4** and **6**, there is only one type of  $J\%$ . The Ising exchange Hamiltonian is:

$$\hat{H}_{exch} = -J\% \hat{S}_{Dy^{III}} \hat{S}_{Dy^{III}'}$$

$J\% = 25 \cos \varphi J$ , where  $\varphi$  is the angle between the anisotropy axes on two Dy<sup>III</sup> sites, and  $J$  is the Lines exchange coupling parameter.  $S_{Dy^{III}} = 1/2$  is the ground pseudospin on the Dy<sup>III</sup> site.  $J\%_{total}$  is the parameter of the total magnetic interaction ( $J\%_{total} = J\%_{dip} + J\%_{exch}$ ) between magnetic center ions. The dipolar magnetic coupling can be calculated exactly, while the exchange coupling constant was fitted through comparison of the computed and measured magnetic susceptibilities using POLY\_ANISO program.<sup>52-54</sup>

**Table S25.** Exchange energies  $E$  (cm<sup>-1</sup>), the energy difference between each exchange doublets  $\Delta_t$  (cm<sup>-1</sup>) and the main values of the  $g_z$  for the lowest two exchange doublets of **2**, **4** and **6**.

|   | <b>2</b>   |                        |        | <b>4</b>   |                        |        |
|---|------------|------------------------|--------|------------|------------------------|--------|
|   | $E$        | $\Delta_t$             | $g_z$  | $E$        | $\Delta_t$             | $g_z$  |
| 1 | 0.00000000 | $0.909 \times 10^{-5}$ | 0.000  | 0.00000000 | $0.276 \times 10^{-4}$ | 0.000  |
|   | 0.00000909 |                        |        | 0.00002757 |                        |        |
| 2 | 0.02462557 | $0.378 \times 10^{-5}$ | 39.556 | 0.70432392 | $0.130 \times 10^{-4}$ | 39.483 |
|   | 0.02462935 |                        |        | 0.70433689 |                        |        |
|   | <b>6_a</b> |                        |        | <b>6_b</b> |                        |        |
|   | $E$        | $\Delta_t$             | $g_z$  | $E$        | $\Delta_t$             | $g_z$  |
| 1 | 0.00000000 | $0.397 \times 10^{-4}$ | 0.000  | 0.00000000 | $0.367 \times 10^{-4}$ | 0.000  |
|   | 0.00003973 |                        |        | 0.00003673 |                        |        |
| 2 | 0.66226579 | $0.194 \times 10^{-4}$ | 39.402 | 0.71914311 | $0.183 \times 10^{-4}$ | 39.363 |
|   | 0.66228523 |                        |        | 0.71916136 |                        |        |

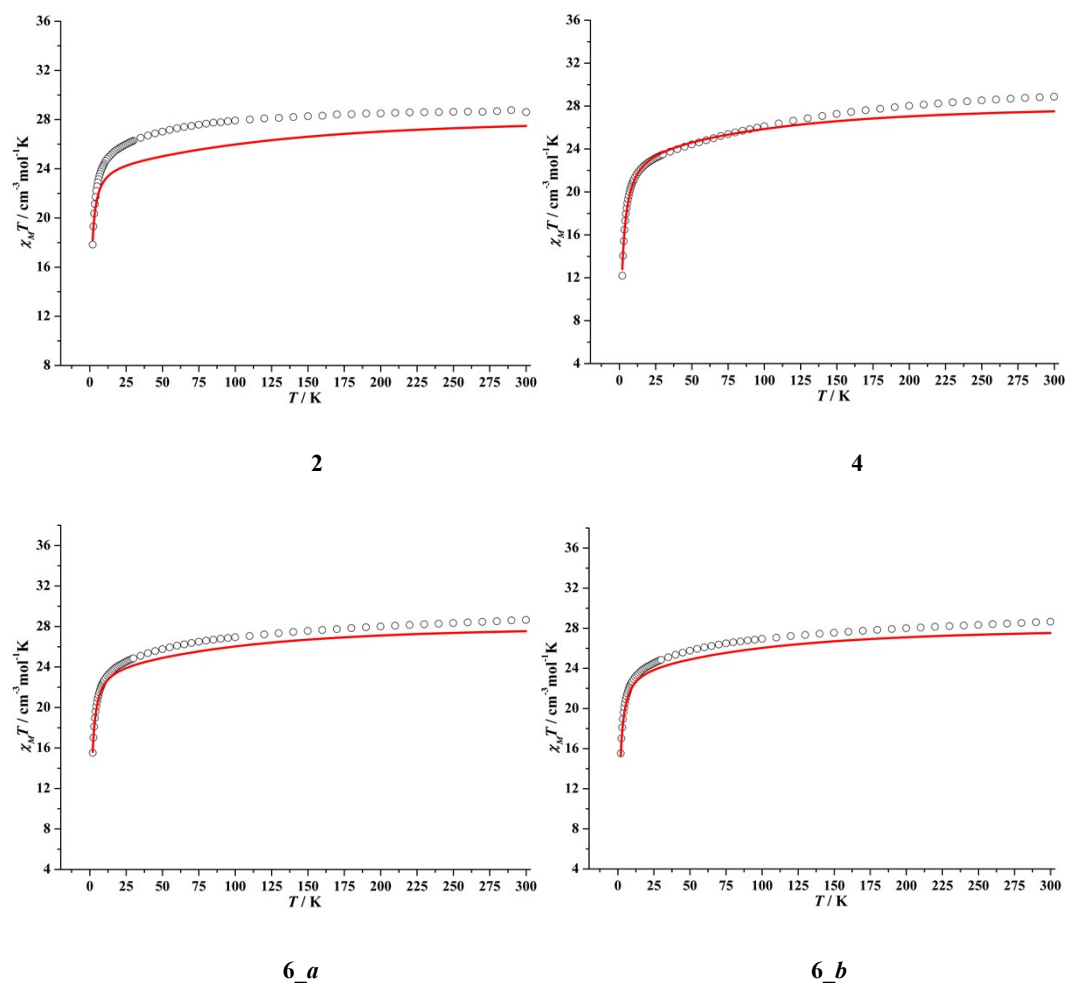

**Fig. S63** Calculated (red solid line) and experimental (black square dot) data of magnetic susceptibilities of **2**, **4**, **6**. The intermolecular interactions  $zJ'$  of complexes **2**, **4** and **6** were fitted to  $-0.04$ ,  $-0.07$ ,  $-0.03$  and  $-0.03$   $\text{cm}^{-1}$ , respectively.

## References:

- S1 Aquilante, F.; Autschbach, J.; Carlson, R. K.; Chibotaru, L. F.; Delcey, M. G.; De Vico, L.; Galván, I. F.; Ferré, N.; Frutos, L. M.; Gagliardi, L.; Garavelli, M.; Giussani, A.; Hoyer, C. E.; Li Manni, G.; Lischka, H.; Ma, D.; Malmqvist, P. Å.; Müller, T.; Nenov, A.; Olivucci, M.; Pedersen, T. B.; Peng, D.; Plasser, F.; Pritchard, B.; Reiher, M.; Rivalta, I.; Schapiro, I.; Segarra-Martí, J.; Stenrup, M.; Truhlar, D. G.; Ungur, L.; Valentini, A.; Vancoillie, S.; Veryazov, V.; Vysotskiy, V. P.; Weingart, O.; Zapata, F.; Lindh, R. *J. Comput. Chem.* **2016**, *37*, 506–541.
- S2 Chibotaru, L. F.; Ungur, L.; Soncini, A. *Angew. Chem., Int. Ed.* **2008**, *47*, 4126–4129.
- S3 Ungur, L.; Van den Heuvel, W.; Chibotaru, L. F. *New J. Chem.* **2009**, *33*, 1224–1230.
- S4 Chibotaru, L. F.; Ungur, L.; Aronica, C.; Elmoll, H.; Pilet, G.; Luneau, D. *J. Am. Chem. Soc.* **2008**, *130*, 12445–12455.
- S5 Lines, M. E. *J. Chem. Phys.* **1971**, *55*, 2977–2984.
- S6 Mondal, K. C.; Sundt, A.; Lan, Y. H.; Kostakis, G. E.; Waldmann, O.; Ungur, L.; Chibotaru, L. F.; Anson, C. E.; Powell, A. K. *Angew. Chem., Int. Ed.* **2012**, *51*, 7550–7554.
- S7 Langley, S. K.; Wielechowski, D. P.; Vieru, V.; Chilton, N. F.; Moubaraki, B.; Abrahams, B. F.; Chibotaru, L. F.; Murray, K. S. *Angew. Chem., Int. Ed.* **2013**, *52*, 12014–12019.
